# Supplementary material
Source: MDPI journal article supplement (https://www.mdpi.com/2673-9984/2/1/10)

# The dark Universe is not invisible

Konstantin Zioutas

*and collaborators (next slide)*

University of Patras / Greece

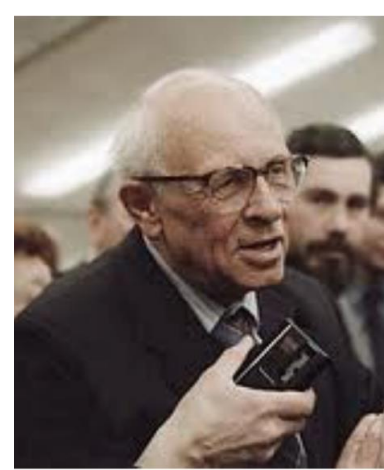

## Further reading:

- Zioutas, K. ; Tsagri, M.; Semertzidis, Y.K. ; Hoffmann, D.H.H.; Papaevangelou, T.; Anastassopoulos, V. *The 11 years solar cycle as the manifestation of the dark Universe*, Mod. Phys. Lett. **2014**, A29(#37) 1440008, <https://arxiv.org/abs/1309.4021> .
- Bertolucci, S.; Zioutas, K.; Hofmann, S.; Maroudas, M. *The sun and its planets as detectors for invisible matter*, Phys. Dark Univ. **2017**, 17 13-21, and ref's therein; <https://doi.org/10.1016/j.dark.2017.06.001> .
- Zioutas, K.; Argiriou, A.; Fischer, H.; Hofmann, S.; Maroudas, M.; Pappa, A.; Semertzidis, Y.K. *Stratospheric temperature anomalies as imprints from the dark universe*, Phys. Dark Univ. **2020**, 28, 100497; <https://doi.org/10.1016/j.dark.2020.100497> .
- Patla, B.R.; Nemiroff R.J.; Hoffmann, D.H.H.; Zioutas, K. *Flux Enhancement of Slow-moving Particles by Sun or Jupiter: Can they be detected on Earth?*, ApJ. **2014**, 780(#2) 158; <https://arxiv.org/abs/1305.2454> .
- Sofue, Y. *Gravitational Focusing of Low-Velocity Dark Matter on the Earth's Surface*, Galaxies **2020**, 8(#2) 42, <https://doi.org/10.3390/galaxies8020042> ; <https://arxiv.org/abs/2005.08252> .
- Helmi, A.; Babusiaux, C.; Koppelman, H.H.; Massari, D.; Veljanoski, J.; Brown, A.G.A. *The merger that led to the formation of the Milky Way's inner stellar halo and thick disk* Nature **2018**, 563, 85–88,. <https://doi.org/10.1038/s41586-018-0625-x>
- More details are given in talks given: 2016 at CERN <https://indico.cern.ch/event/520074/> & 2018 in ECT / Trento <https://indico.ectstar.eu/event/25>.

**Conference** <https://ecu2021.sciforum.net/> : 1<sup>st</sup> Electronic Conference on Universe ; **Session:** The Universe of Andrei Sakharov

24/2/2021

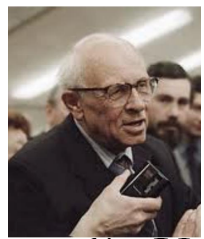

**Co-authors:** V. Anastassopoulos<sup>1</sup>, A. Argiriou<sup>1</sup>, G. Cantatore<sup>2</sup>, S. Cetin<sup>3</sup>, A. Gardikiotis<sup>1</sup> \$, DHH Hoffmann<sup>4</sup>, S. Hofmann<sup>5</sup>, M. Karuza<sup>6</sup>, A. Kryemadhi<sup>7</sup>, M. Maroudas<sup>1</sup> &), EL Matteson<sup>8</sup>, K. Ozbozduman<sup>9</sup>, T. Papaevangelou<sup>10</sup>, M. Perryman<sup>11</sup>, YK Semertzidis<sup>12</sup>, I. Tsagris<sup>1</sup> #, M. Tsagri<sup>1</sup> #, G. Tsiledakis<sup>10</sup>, D. Utz<sup>13</sup>, E. Valachovic<sup>14</sup>

1) U. Patras, Patras-Rio, Greece, 2) U. & INFN, Trieste, Italy, 3) Bilgi U., Istanbul, Turkey, 4) XJTU, XiAn, China, 5) Munich, Germany, 6) U. Rijeka, Croatia, 7) Messiah U., Mechanicsburg, PA, USA, 8) Mayo Clinic, Rochester, MN, USA, 9) Bogazici U., Istanbul, Turkey, 10) IRFU/CEA, Gif-sur-Yvette, France, 11) U. Bath, UK, 12) IBS / KAIST, Daejeon, Korea, 13) IGAM / Institute of Physics, U. of Graz, Austria, 14) U. Albany, Albany, NY, USA  
Present address: #) Geneva, Switzerland, \$) U. Hamburg, Hamburg, Germany,  
&) contact, email: [marios.maroudas@CERN.CH](mailto:marios.maroudas@CERN.CH), Tel. : +306946194195

**Abstract:** *Dark matter (DM) came from long-range gravitational observations which actually does not interact with ordinary matter. Though, on much smaller scales, a number of unexpected phenomena contradict this picture for DM. Because, some of the solar activity or the dynamic earth's atmosphere might arise from DM streams. Gravitational (self-)focusing effects by the Sun or its planets of streaming DM fits as the underlying process, e.g., for the otherwise puzzling 11-year solar cycle, the mysterious heating of the solar corona with its fast temperature inversion, etc. Observationally driven we arrive to an external impact by as yet overlooked "streaming invisible matter", which reconciles some of the investigated mysterious observations. Unexpected planetary relationships exist for the dynamic Sun and Earth atmosphere and are considered as the signature for streaming DM. Then, focusing of DM streams could also occur in exoplanetary systems, suggesting for the first time investigations by searching for the associated stellar activity as a function of the exoplanetary orbital phases. The entire observationally driven reasoning is suggestive for highly cross-disciplinary approaches including also (puzzling) bio-medical phenomena. Favorite candidates from the dark sector are the highly ionizing anti-quark nuggets, magnetic monopoles, but also particles like dark photons.*

***“All we know is dark matter is well hidden” => “dark”***

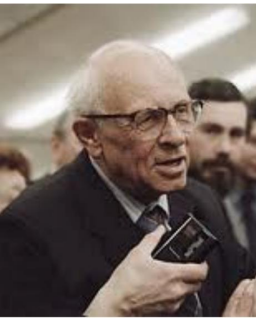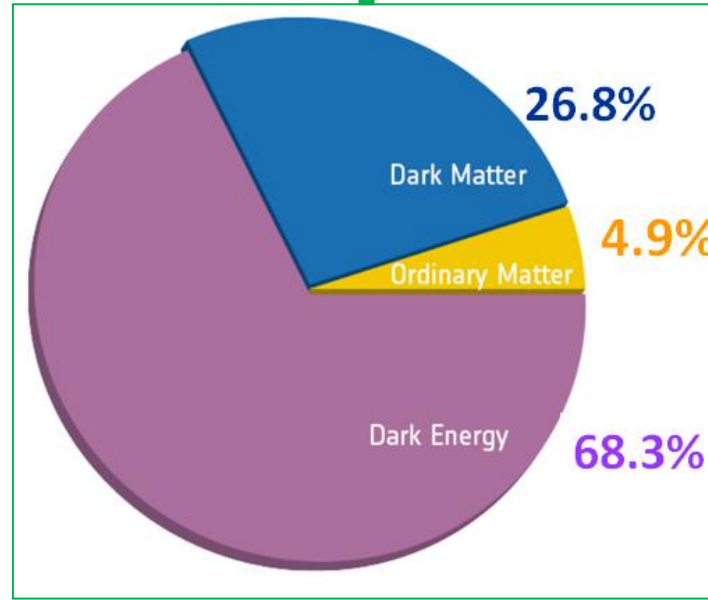

**16<sup>th</sup> February 2021:** <http://spaceref.com/astronomy/the-smallest-galaxies-in-our-universe-bbring-more-about-dark-matter-to-light.html>

Our universe is dominated by a mysterious matter known as **DM**. ***Its name comes from the fact that DM does not absorb, reflect or emit electromagnetic radiation***, making it difficult to detect.

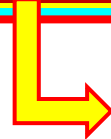

***Counter examples => this work***

## Our working hypotheses:

- Planetary (and solar) gravitational focusing of non-relativistic “*invisible massive particles*”
- The focused invisible streaming matter **interacts “strongly”** with solar / planetary atmospheres >> **no screening, ...**
- Repeating activity enhancement during **planetary alignment**

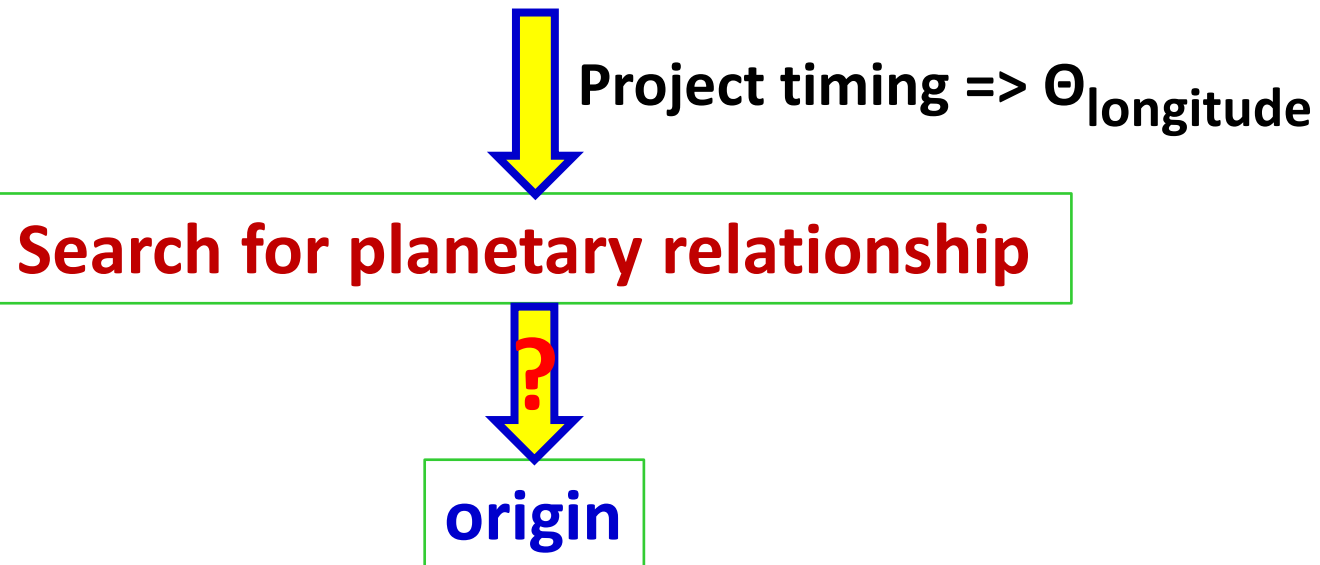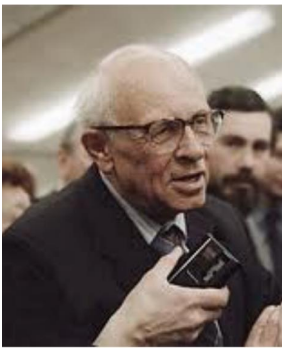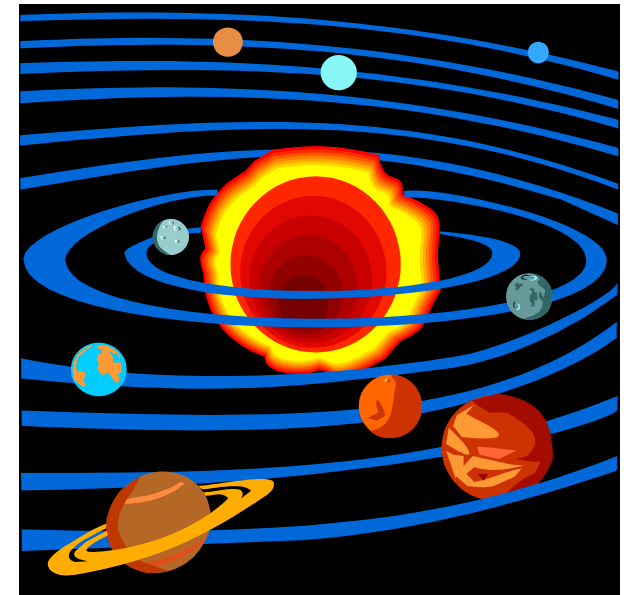

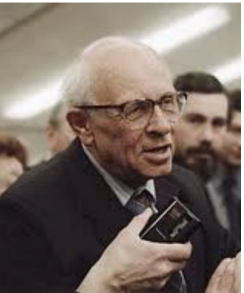

# Gravitational lensing

$\gg \gg \gg \Theta_{\text{deflection}} \sim 1/v^2$

1

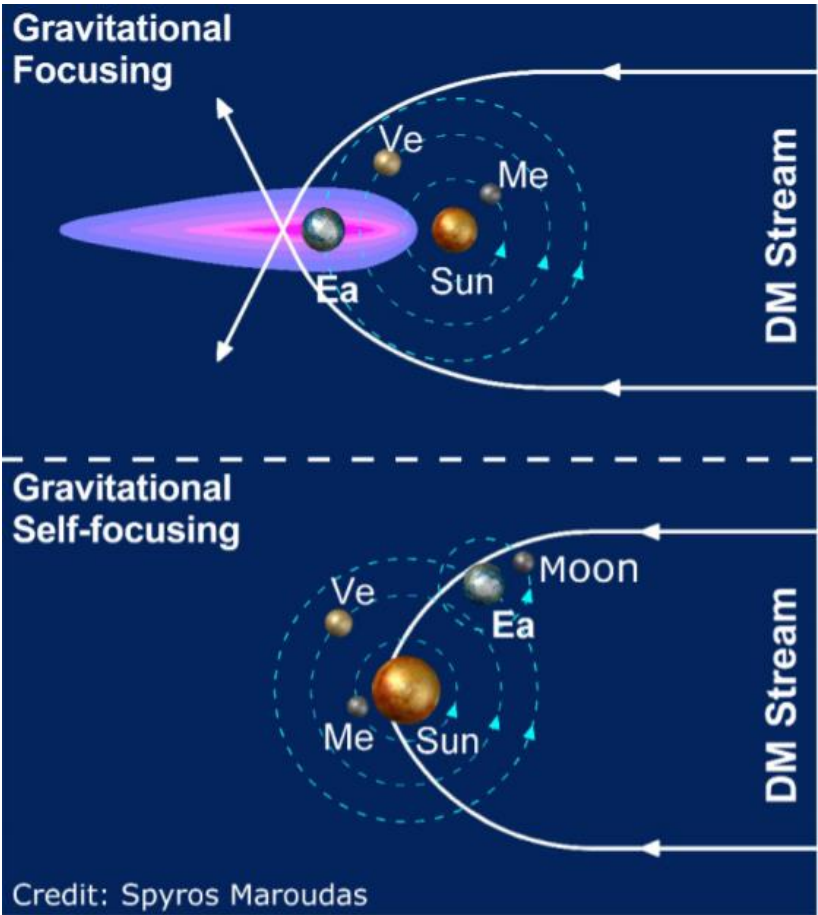

2

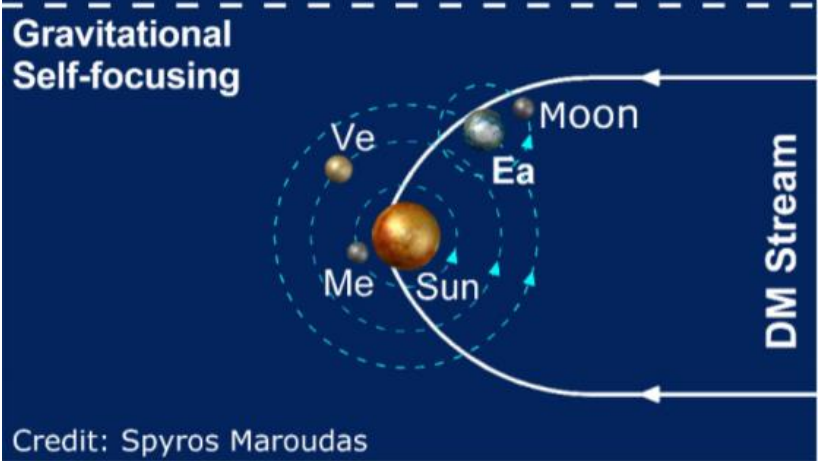

Credit: Spyros Maroudas

Cartoon illustration of gravitational (self-)focusing effects of DM streams

18<sup>th</sup> December

Galactic Centre

Gravit. (self)-focusing ...  $\gg$  free fall

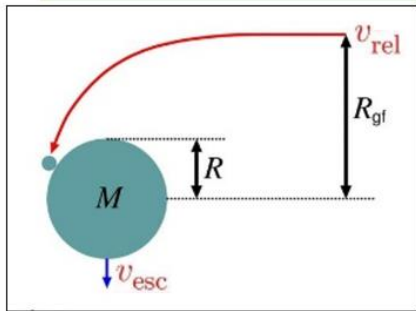

2 peaks  $\sim 180^\circ$  apart!

[Adrien Leleu]

$$\sigma_{\text{trap}} = \pi R^2 \left( 1 + \frac{v_{\text{esc}}^2}{v_{\text{rel}}^2} \right)$$

SUN:  $v_{\text{esc}} = 612 \text{ km/s}$

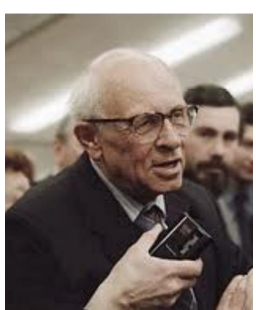

**Within known physics**

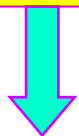

**Dark sector signatures are not expected**

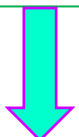

**Unexpected Solar / terrestrial behavior**

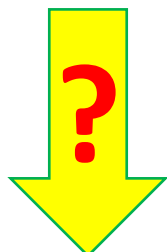

**Are insisting anomalies/mysteries in the solar system  
the unnoticed manifestation of the dark Universe → Yes** (this work).

**How? Why? >> not ALL!**



**ZWICKY, 1933:** DM from unexpected cosmic scale obs's.

**WOLF, 1859:** “*first*” to suspect planetary involvement @ Sun

>> **HOW?**

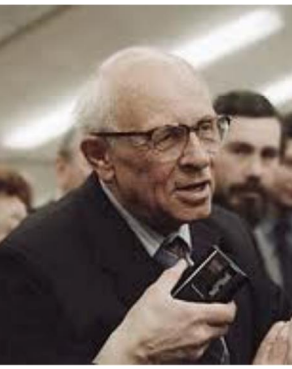

Inbetween:

1. Several s⊗all scale unexpected observations.
2. **WOLF** **ZWICKY**
3. clear planetary relationship

→ **streaming DM**

*The key feature* + driving idea for this work  
==> *what else?*

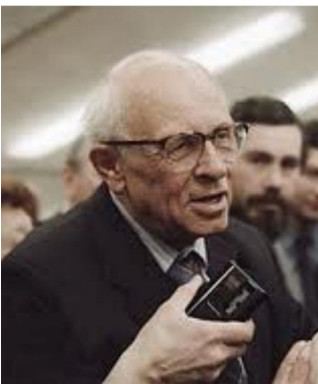

# The 11-year solar cycle

11yrs  $\approx$  11.86 yrs  
solar cycle  $\approx$   $P^{\text{JUPITER}}$

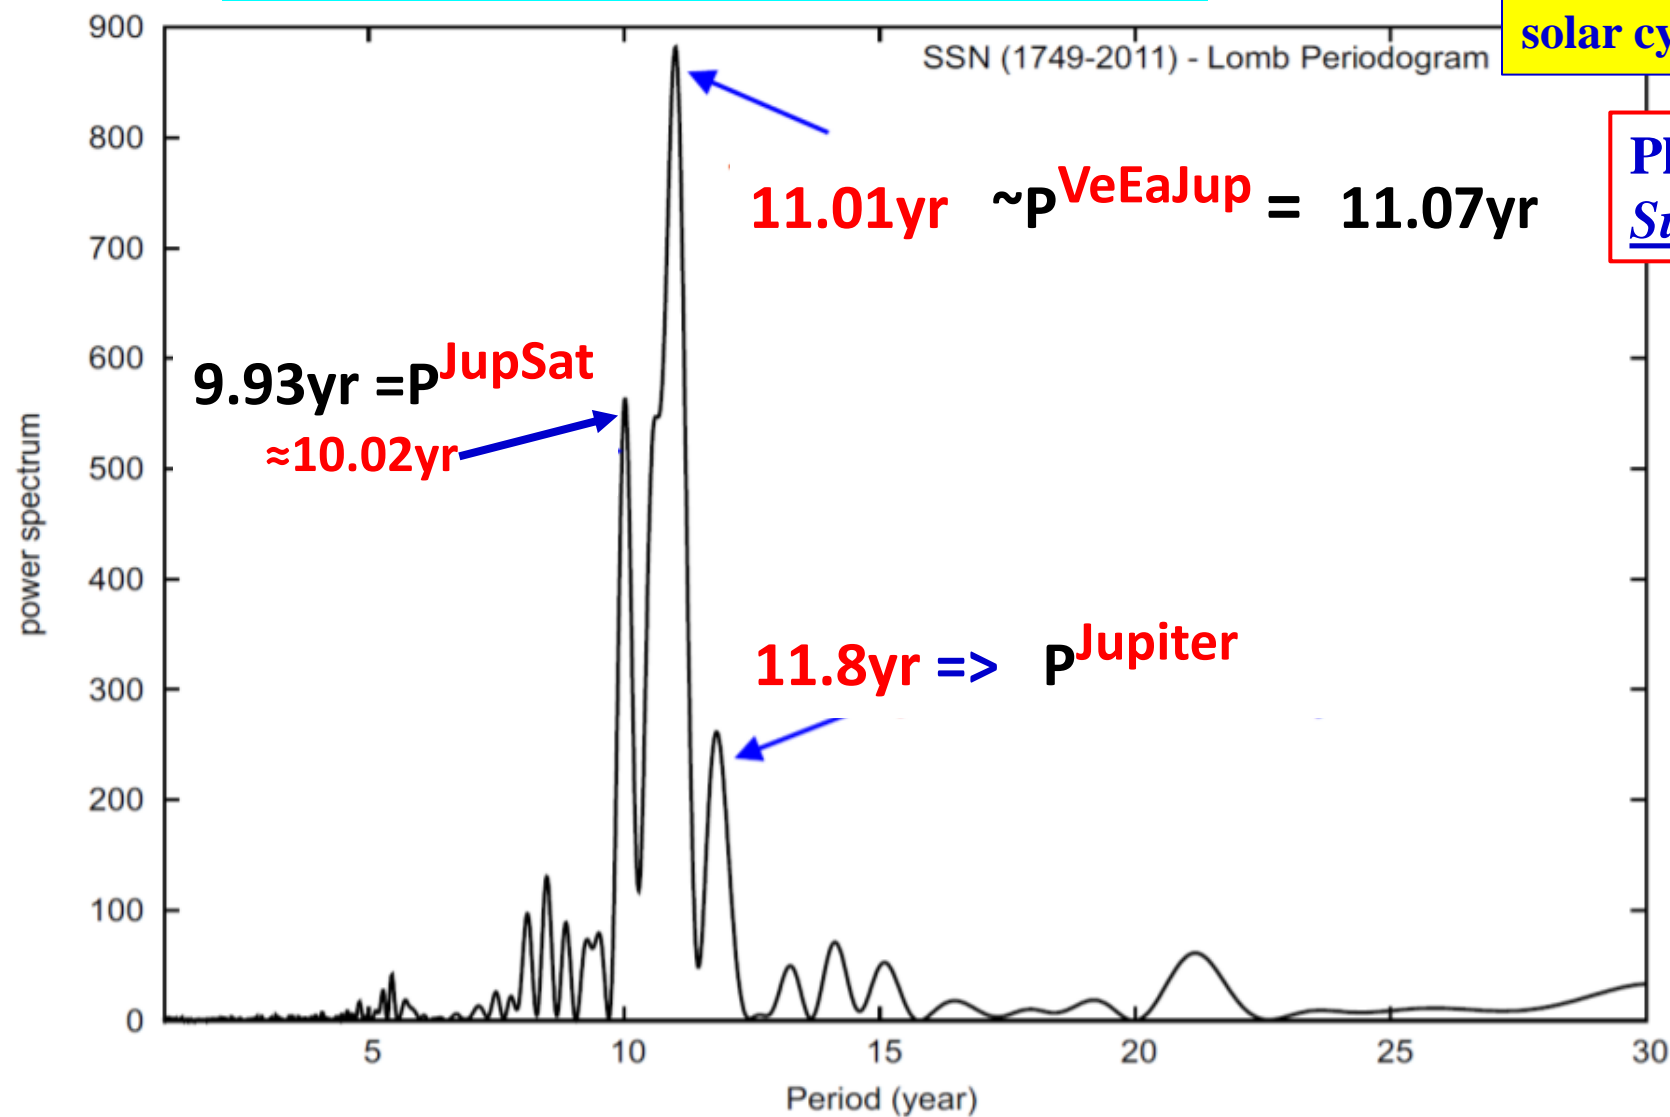

Planetary dependence  
Suspected since 1859

Remote Force?

The Q ever since!



# The theory of a planetary modulation of solar activity ..... Overlooked!

*Extract of a Letter from Prof. R. Wolf, of Zurich, to Mr. Carrington, dated Jan. 12, 1859.*

*(Translation.)*

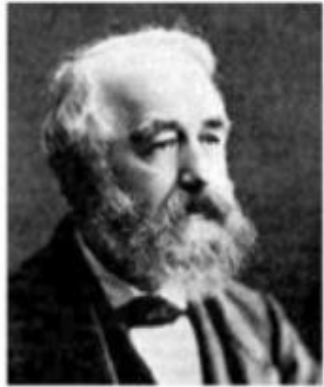

## 400 Years of Sunspot Observations

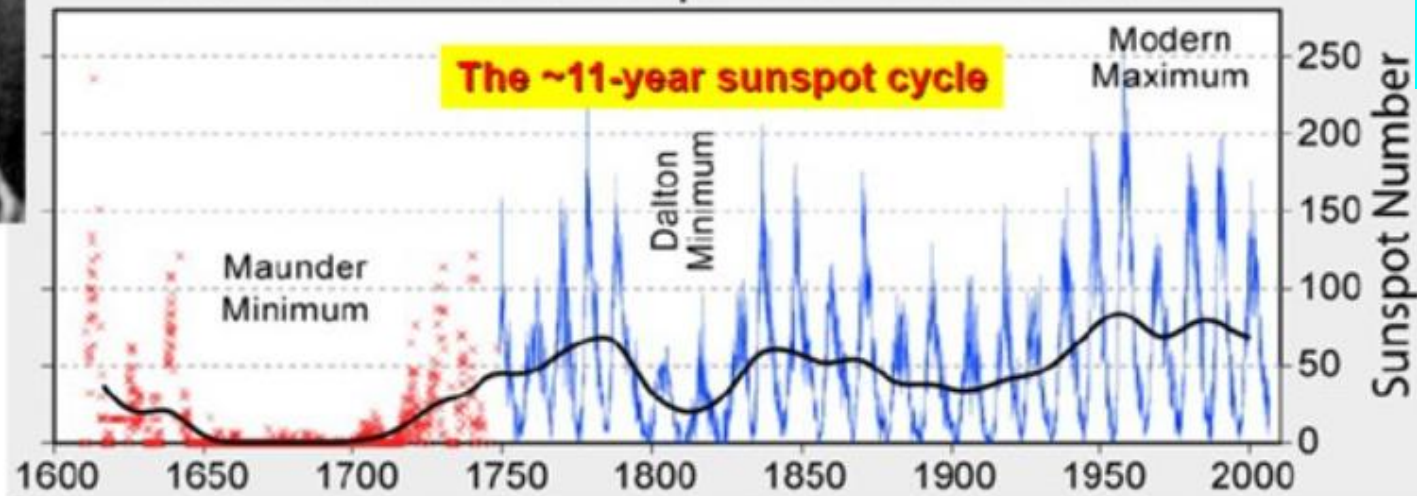

the same planets, the conclusion seems to be inevitable, that my conjecture that the variations of spot-frequency depend on the influences of Venus, Earth, Jupiter, and Saturn, will not prove to be wholly unfounded. The preponderating planet

Too weak within known physics

therefore abandoned!

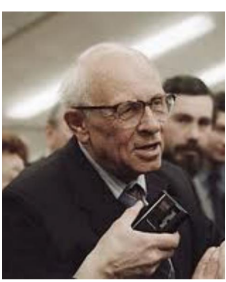

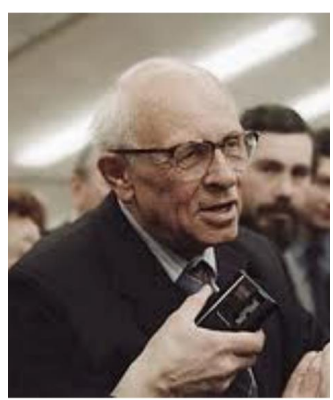

## The key signature:

**Planetary relationships** of solar system observables

→ *remote planetary forces unknown, except:*

⇒ **gravitational tidal forces:**

- Smooth change  $\sim 1/R^3$  → do not fit obs's
- too feeble: missing factor  $\leq 10^{-11}$  &)
- *Peaking dependence excludes  
a remote planetary interaction*

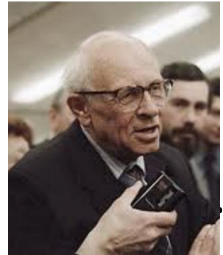

Discarded...

1967

MERCURY

2017

Planetary dependence

because inconsistent w'  $1/R^3$  tidal force

<http://adsabs.harvard.edu/abs/1967AJ.....72..463B> AJ (1967)

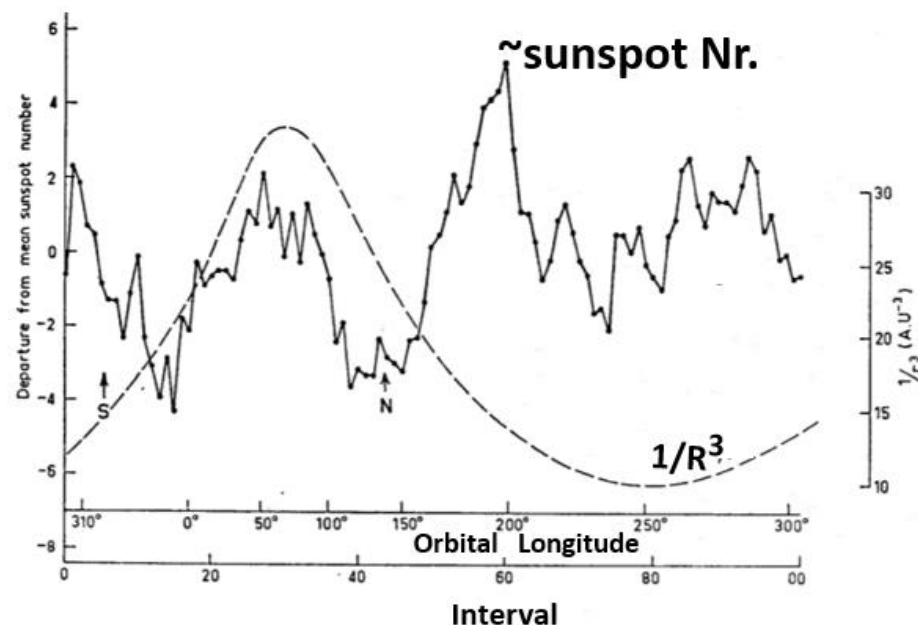

FIG. 4. Departures from mean sunspot numbers as a function of Mercury's position. Equivalent to the mean waveform of the detected signal.

*"It is immediately obvious that no simple theory will entirely account for this complex pattern, but one of the maxima occurs near Mercury's closest approach to the sun and the two conspicuous minima occur quite close to the planet's greatest departures from the plane of the earth's orbit (N and S in Fig.)."*

<http://dx.doi.org/10.1016/j.dark.2017.06.001>

Phys.Dark Univ. (2017)

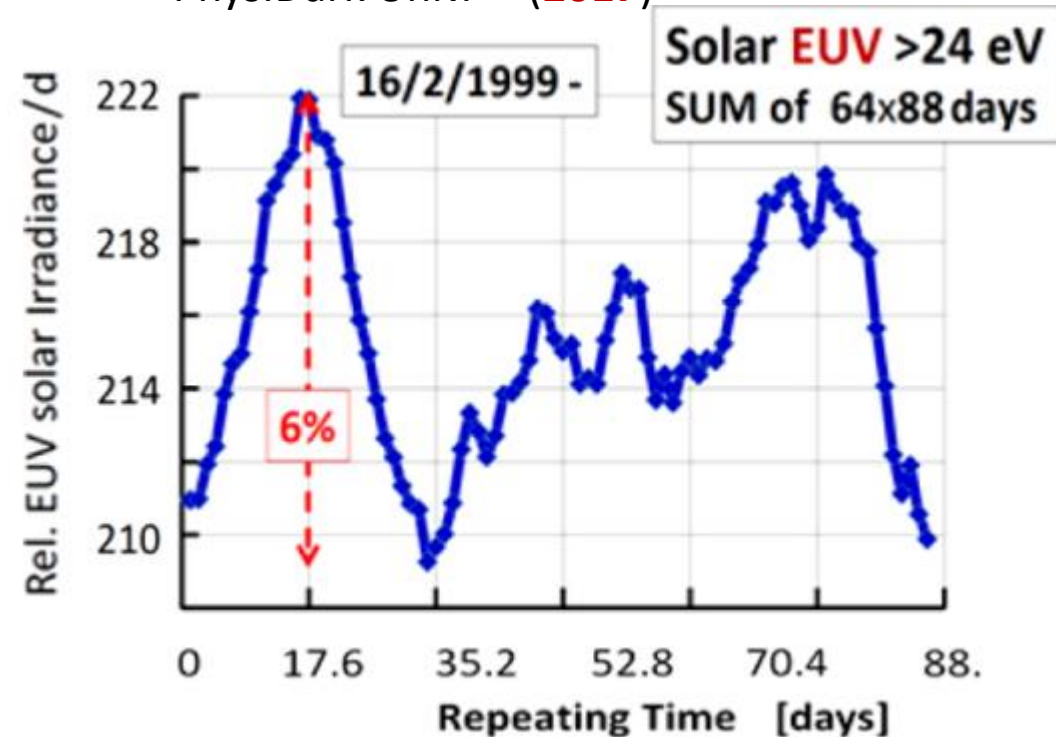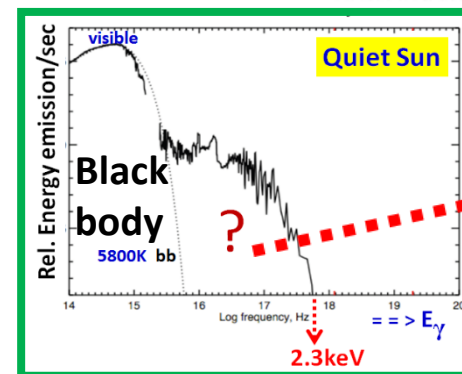

The manifestation of the hot corona



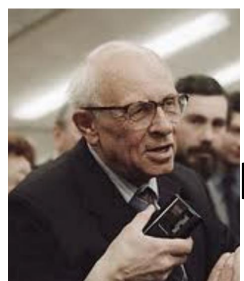

Discarded...

1967

MERCURY

2017

Planetary dependence

because inconsistent w'  $1/R^3$  tidal force

<http://adsabs.harvard.edu/abs/1967AJ.....72..463B> AJ (1967)

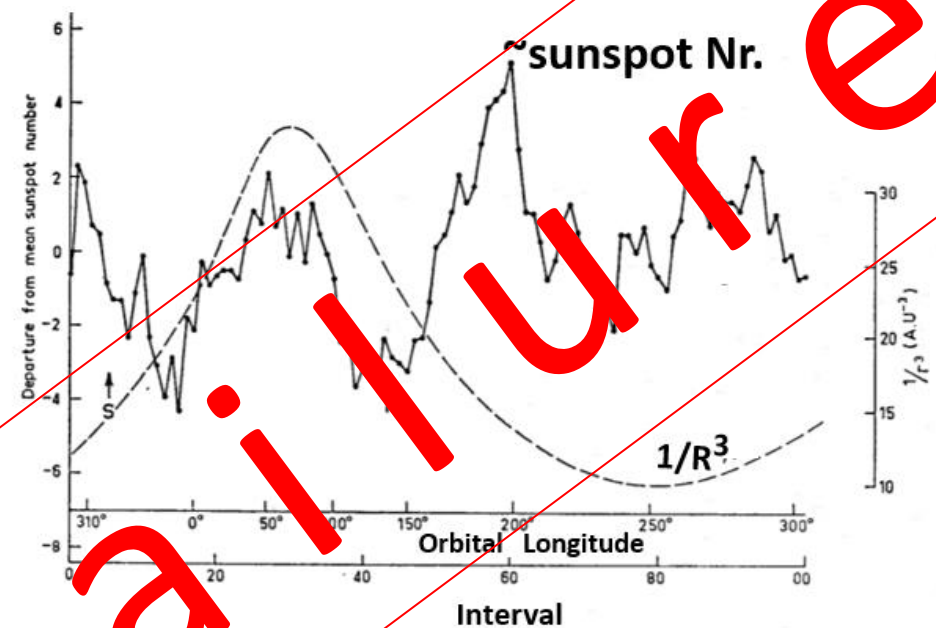

FIG. 4. Departures from mean sunspot numbers as a function of Mercury's position. Equivalent to the mean waveform of the detected signal.

It is immediately obvious that no simple theory will entirely account for this complex pattern, but one of the maxima occurs near Mercury's closest approach to the sun and the two conspicuous minima occur quite close to the planet's greatest departures from the plane of the earth's orbit (N and S in Fig.).

<http://dx.doi.org/10.1016/j.dark.2017.06.001>

Phys. Dark Univ. (2017)

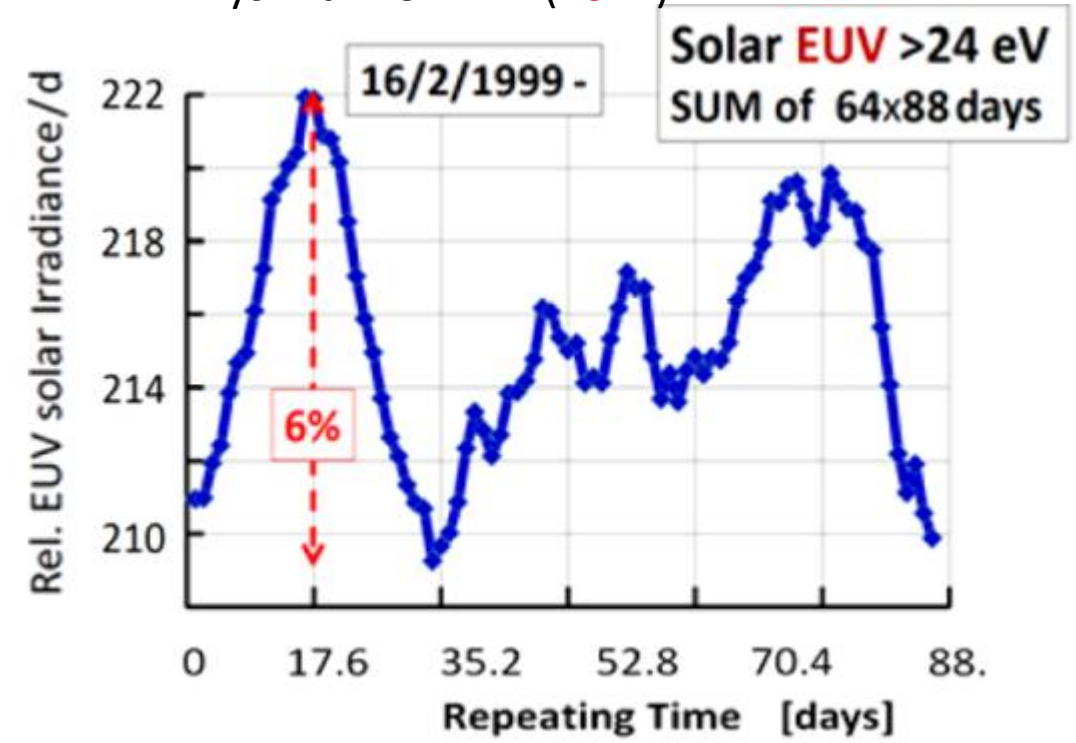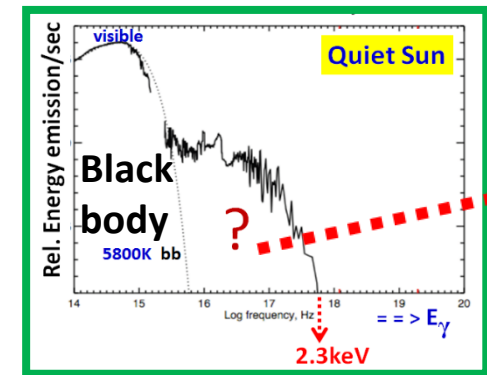

The manifestation of the hot corona

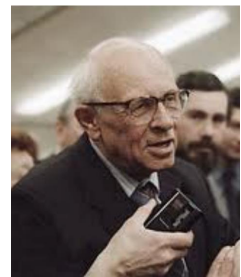

**So far:**

*Various solar / terrestrial obs's show planetary relationship. see below*

**Rule of thumb:**

An obs' with 11yrs rhythm implies planetary dependence

**Note:**

*a planetary relationship can show-up only if the underlying cause within the solar system is (partly) in form of streams.*

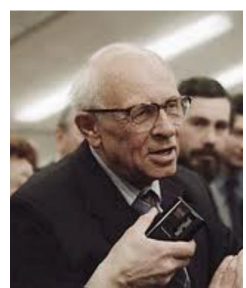

*More...*

*...planetary relationships within the solar system*

+

*in exoplanetary systems?*



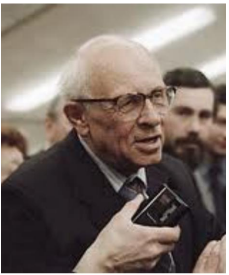

# Solar Flares

1859 - *unpredictable mysteries*  
*one of the most important challenges in solar physics* [1]

# Solar Corona

1939 - *one of the fundamental problems*  
*in space science* [2].

# Ionosphere

1937 - *a long-standing unexplained annual anomaly* [3]:  
 $\rho_e(\text{DEC}) > \rho_e(\text{JUNE})$

*Unanswered puzzles within known physics!*

Proxy of solar activity

**Sunspots + MBPs + solar elemental composition + 2.8 GHz + ...**

[1] V. Polito *et al.*, *ApJ* 816 (2016) 89 ; <https://doi.org/10.3847/0004-637X/816/2/89>

[2] J.A. Klimchuk *et al.*, *PASJ* (2017); <https://arxiv.org/abs/1709.07320>

[3] E.V. Appleton, *Proc. Roy. Soc. London A* 162 (1937) 451; <http://rspa.royalsocietypublishing.org/content/162/911/451> .

# Solar Flares

peaking &) planetary relationships !

&) exclude a remote planetary interaction, e.g., tidal forces

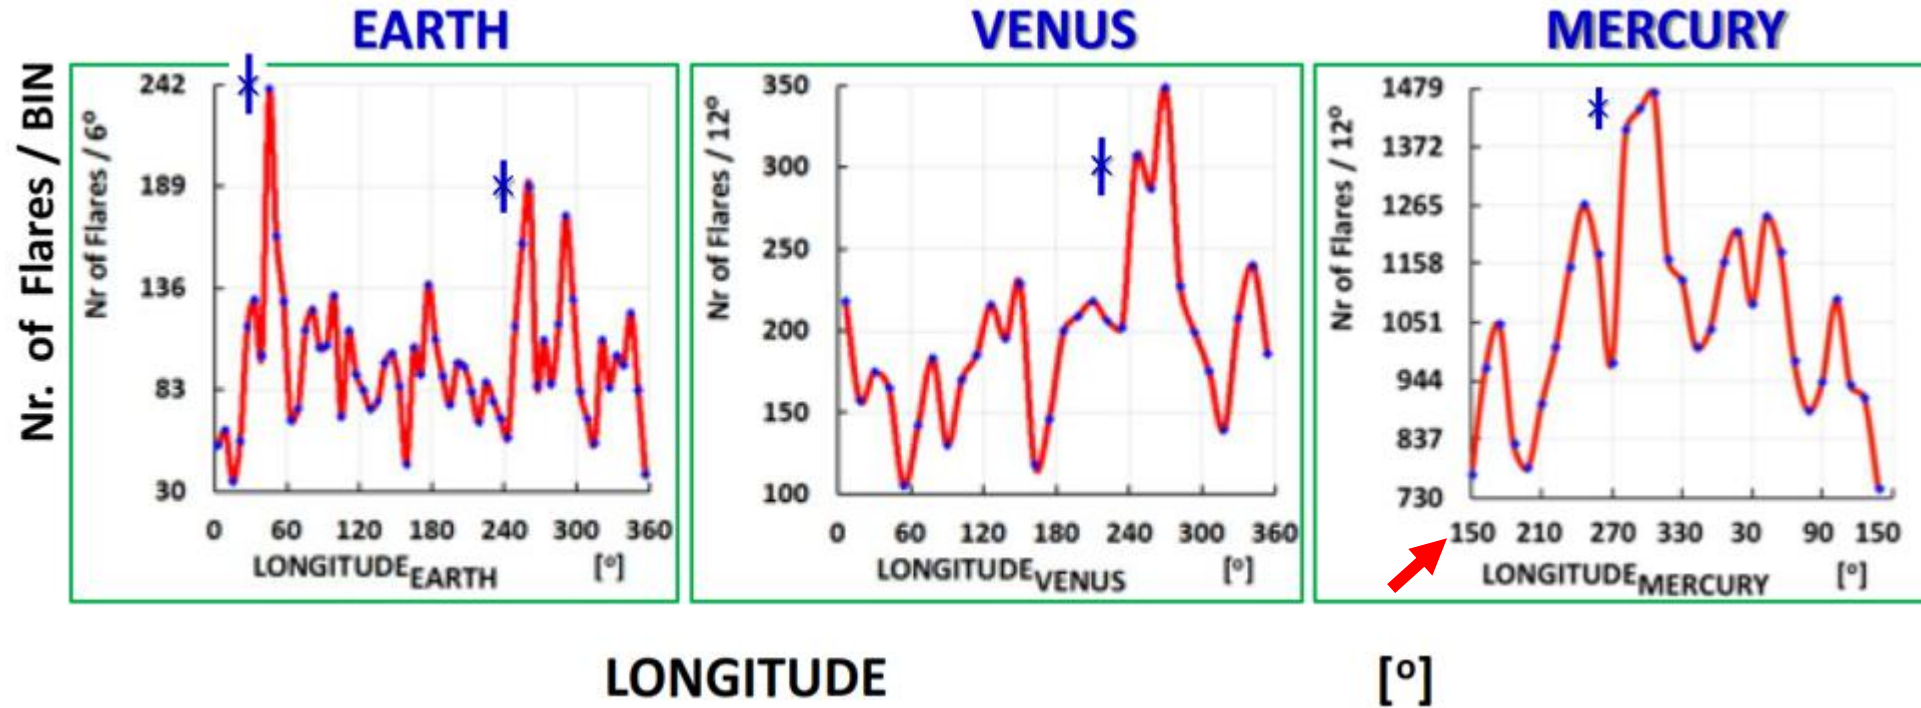

Data from M.J. Aschwanden

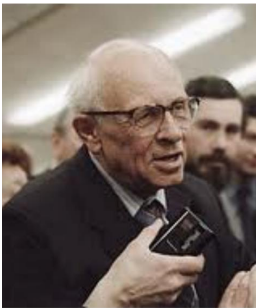

**MERCURY**  
⊗  
**VENUS**

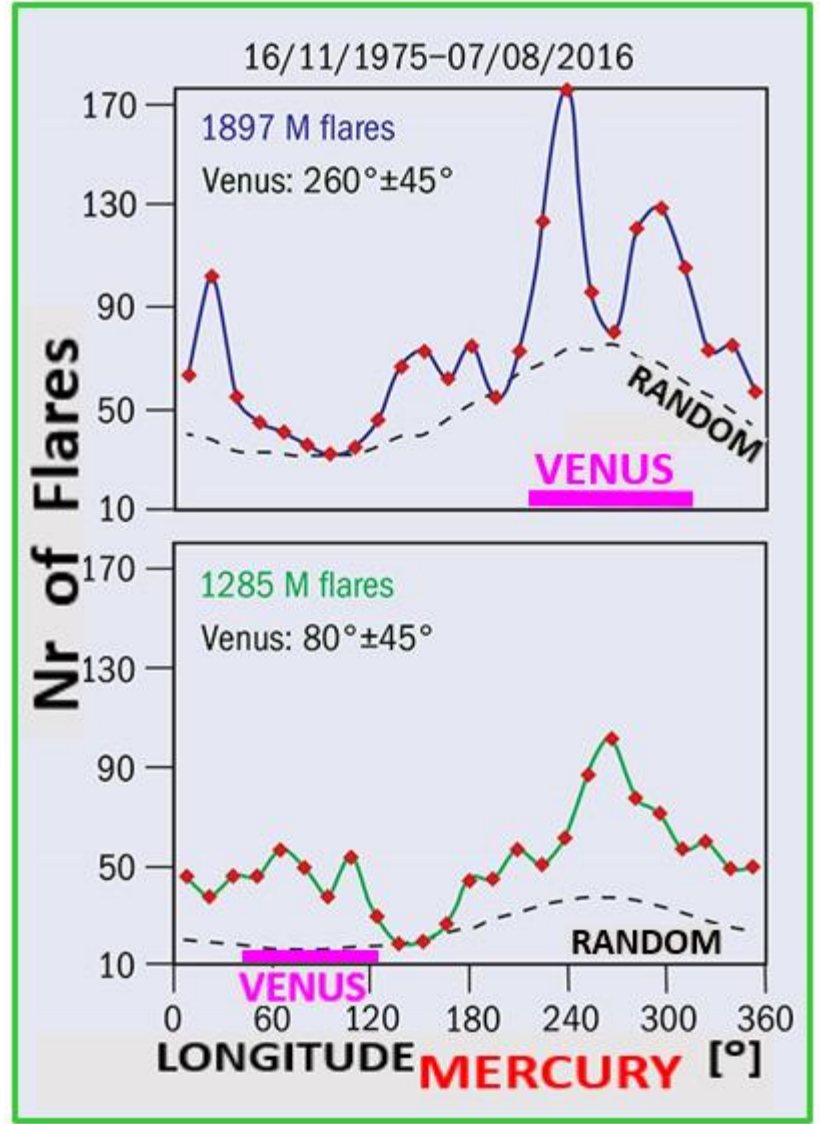

### M-class solar flares

- **EXCESS/RANDOM >45%**  
→ dominating planetary impact ←
- **3 NARROW PEAKS**  $\Rightarrow$  tidal forces

**Sunspots 1900-2016** >> **MARS-EARTH synod** = 780 days => **substructure!**

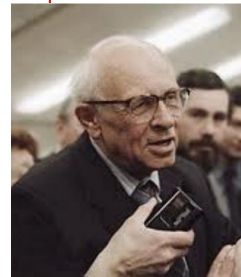

**Σ Nr. of Sunspots/15 days**

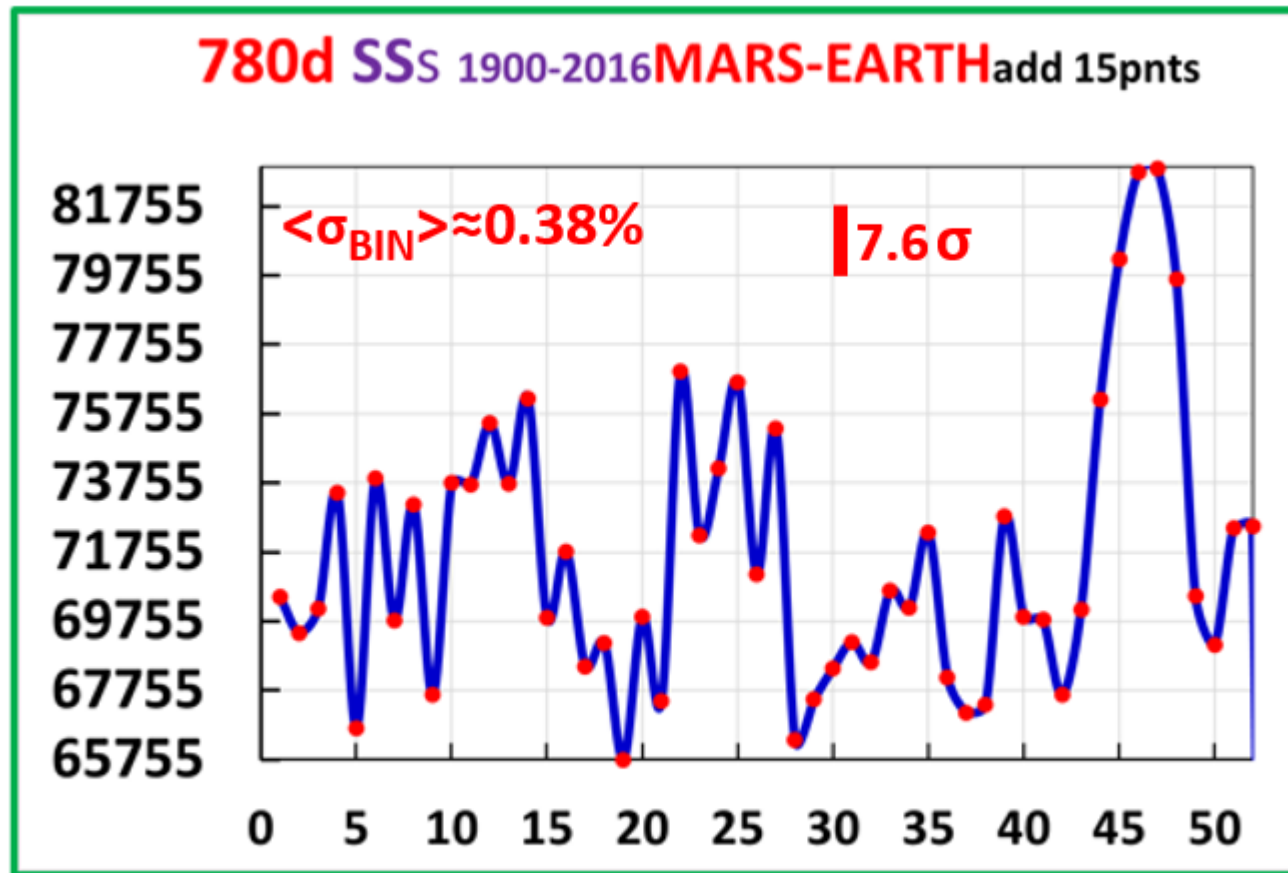

**54x 780 days**

**Combined planetary relationship**

**Synod**

**Simplest FOURIER analysis with time resolution.**

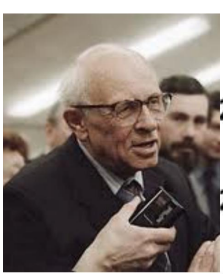

# IONOSPHERE's ANOMALY

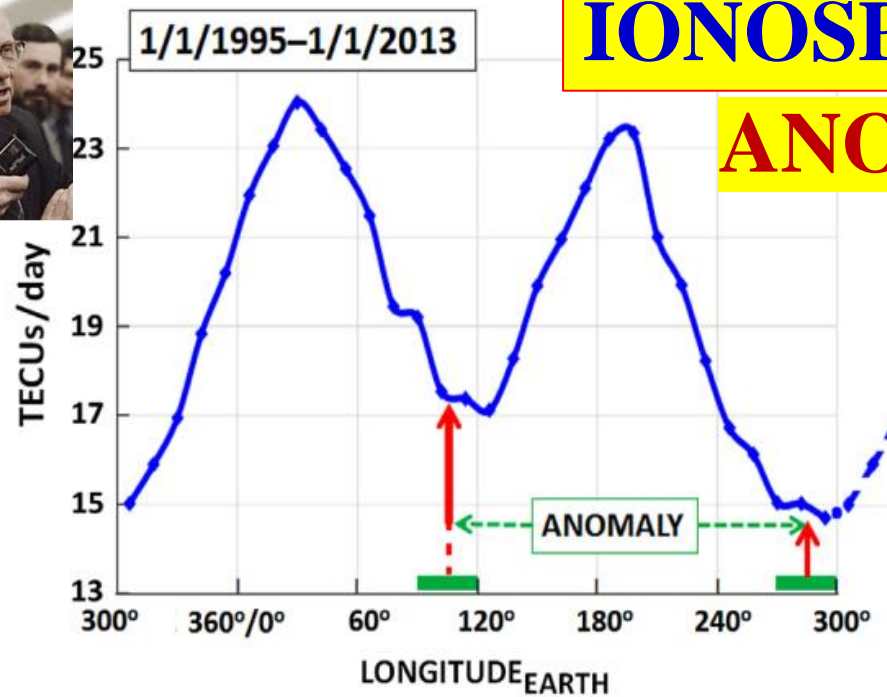

The measured atmospheric total electron content in TECUs, 1 TECU =  $10^{16}$  e/m<sup>2</sup>] as a function of the Earth's heliocentric longitude averaged over 1 day (1995–2012).

PDU (2017) <http://dx.doi.org/10.1016/j.dark.2017.06.001>

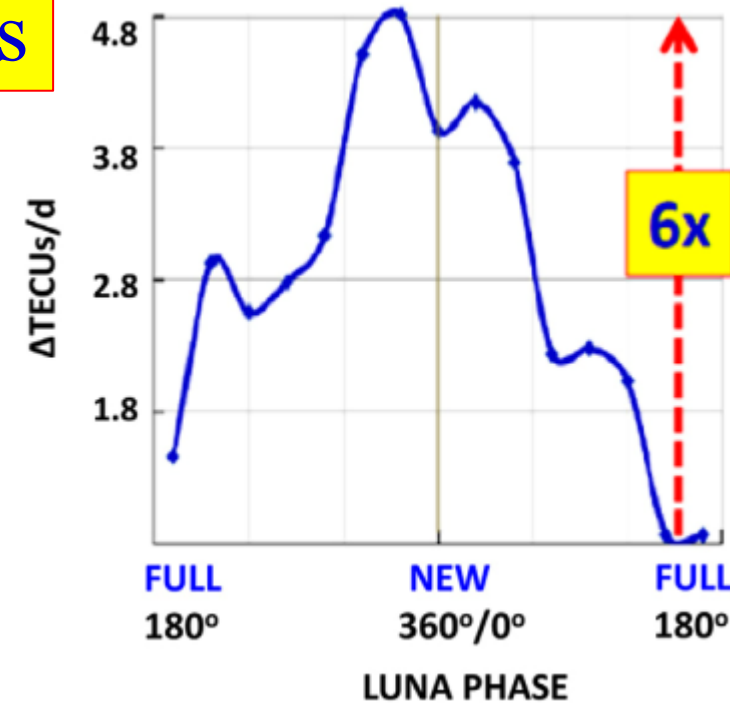

ΔTECUs: the difference between the winter–summer solstices (s. Fig. on the right) = f(Moon Phase), while the Earth is in one of the two 30° orbital segments (green bars on the left Fig.)

PDU (2017) <http://dx.doi.org/10.1016/j.dark.2017.06.001>

➔ Moon as gravitational lens? >> YES =>

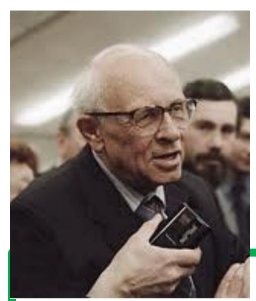

**Moon** → **Earth** focusing:  $\leq 400 \text{ km/s}$

amplification  $\approx 10^4 \times$

**Earth** intrinsic self-focusing: max @ 17 km/s (  $10^9 \times$  )

[Sofue] 2020 <https://arxiv.org/abs/2005.08252>

[A.Kryemadhi, M. Vogelsberger, K.Z. *in prepar.* (2021)]

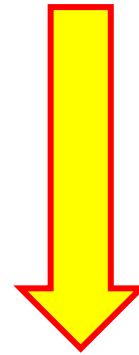

→ Overlooked in DM research ←



# Stratosphere: temperature anomalies as imprints from the dark Universe

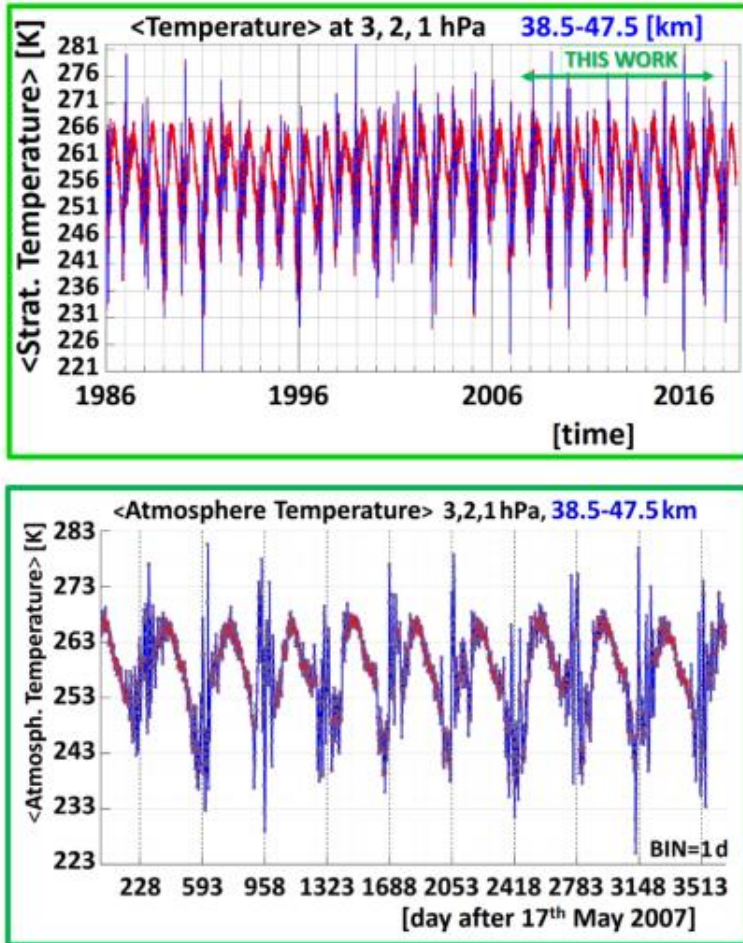

Fig. 1. (Top) Time dependence of the mean daily stratospheric temperature  $[(00:00+12:00)/2]$  at 3, 2, 1 hPa (altitude  $\approx 38.5, 42.5, 47.5$  km),  $42.5^\circ\text{N}/13.5^\circ\text{E}$  and for the period 1986–2018. The period analysed in this work is indicated and it is also shown expanded (Bottom). The vertical dashed lines are year boundaries: 1st January of 2008 ... 2017. The error bar of each point is equal to 0.5 K [19].

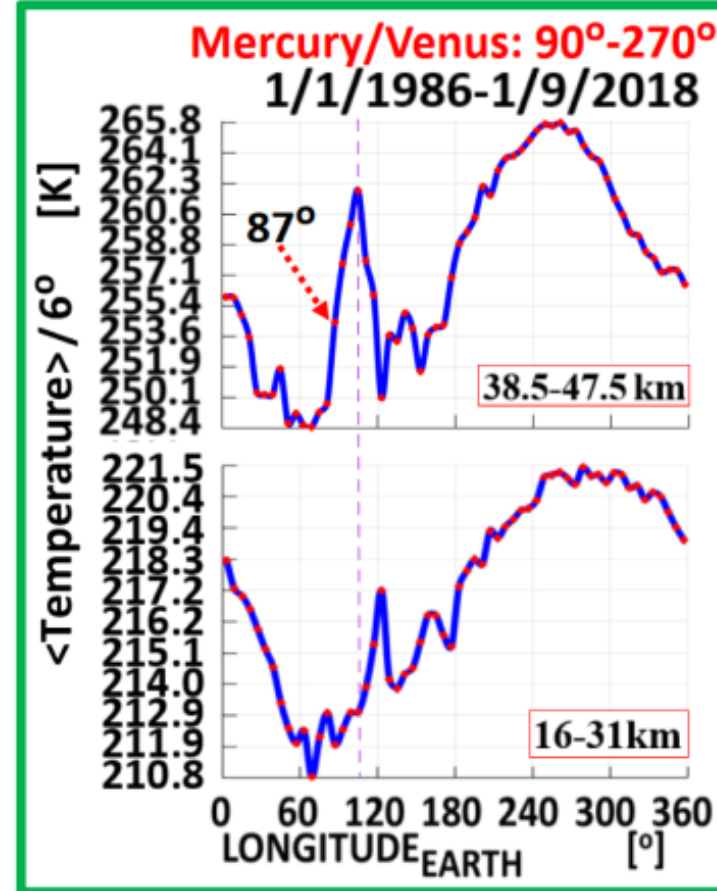

Fig. 8. A comparison between the mean temperature spectra of the upper stratosphere (top) and the lower stratosphere (bottom). The lower stratosphere (16–31 km) is the main Ozone layer, which is strongly affected by the solar UV. The striking difference between both spectra implies that the upper stratosphere (38.5–47.5 km) is marginally or even not affected at all by the solar UV. The position of the Galactic Center in this plot is at  $\sim 86.5^\circ$ , and the upper stratosphere reaches its maximum temperature  $\sim 18$  days later.

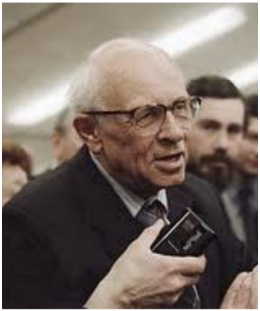

# “Solar composition problem”

The mystery of the  
sun’s missing matter

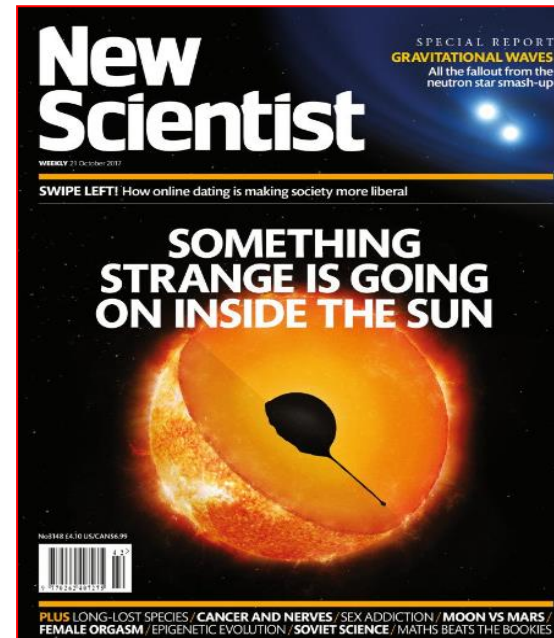

! *“perhaps we are looking at  
the sun in the wrong way”* !

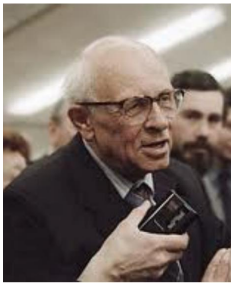

Elemental  
Composition

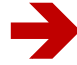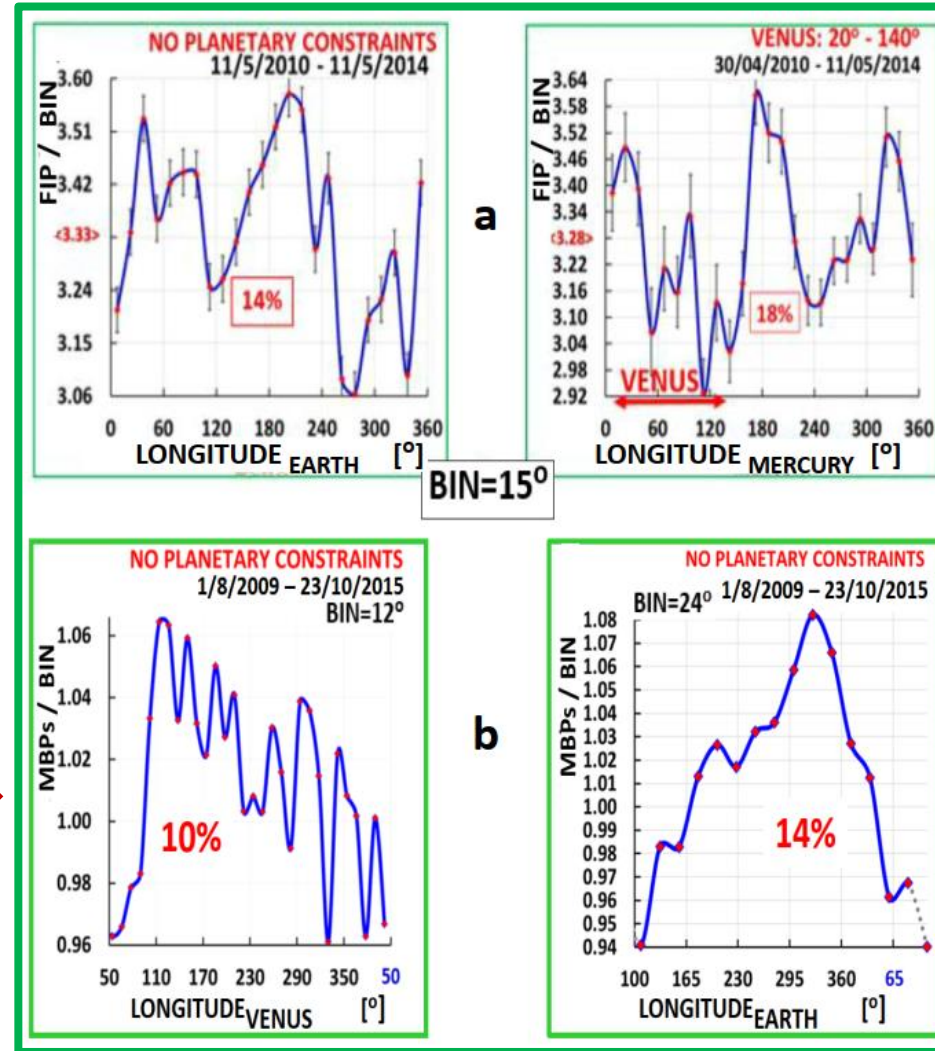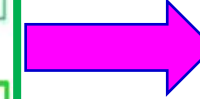

**Planetary relations:**  
how to reconcile w.  
conventional picture?

Magnetic  
Bright points

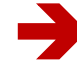

(a) <https://www.nature.com/articles/s41467-017-00328-7> NATURE Comm. 2017

(b) <https://arxiv.org/abs/1710.01678> PASJ 2017

M. Maroudas and D. Utz, work in preparation

2021



F10.7cm = 2.8 GHz solar line  
→ SOLAR PROXY ←

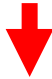

Solar spectrum:  $\lambda \Rightarrow 5\text{-}30\text{cm}$

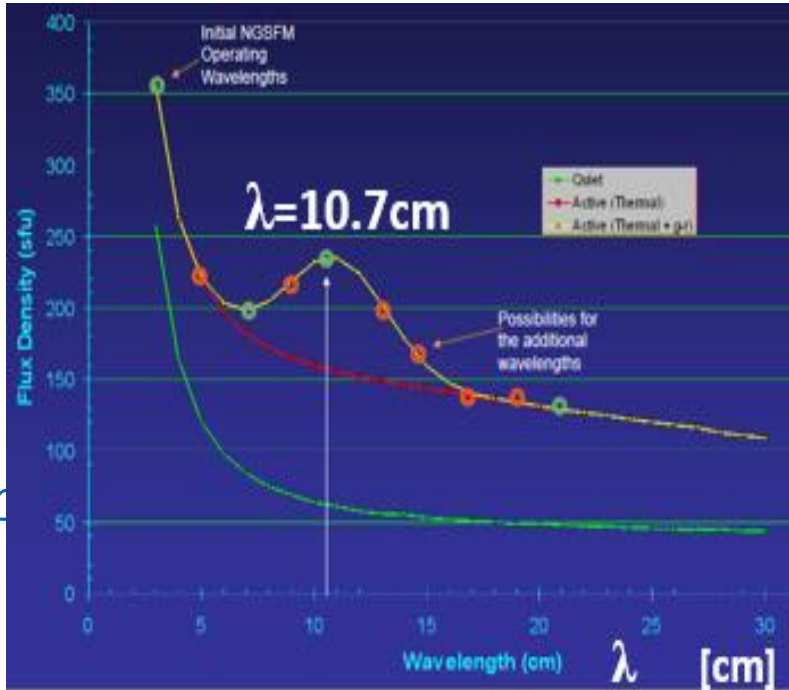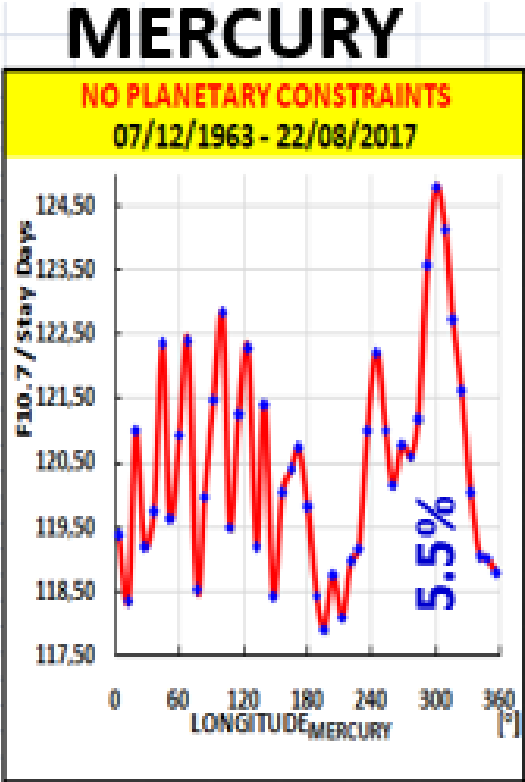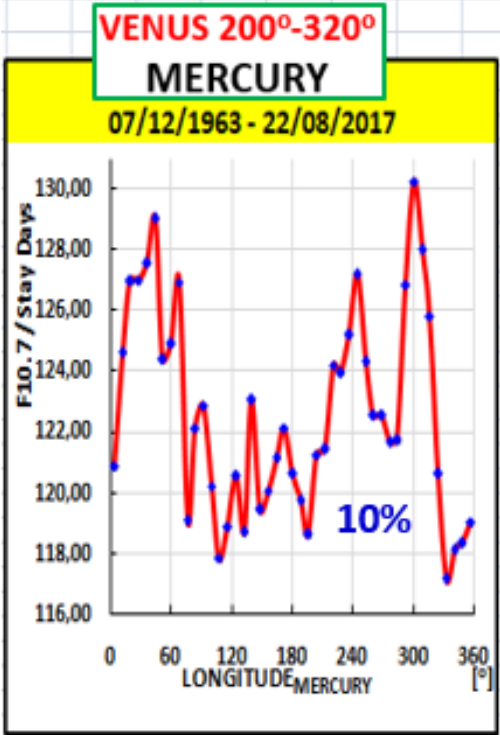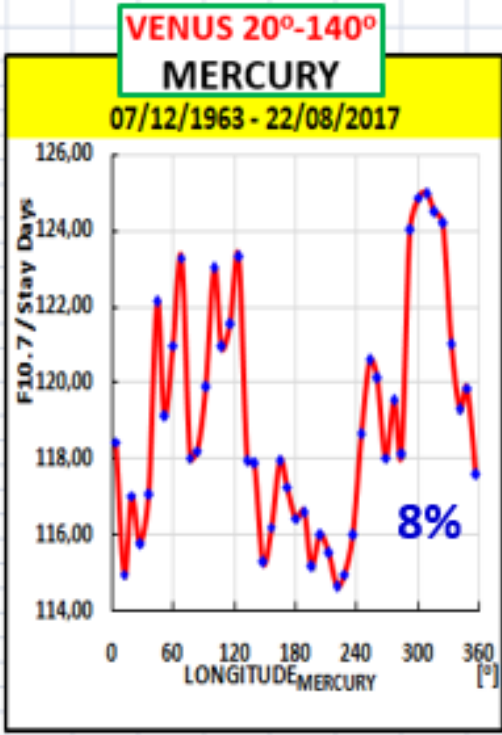

===== LONGITUDE **MERCURY** [°] =====>

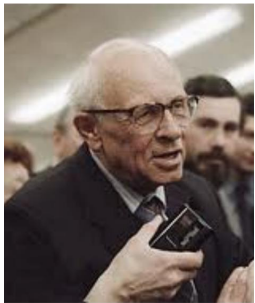

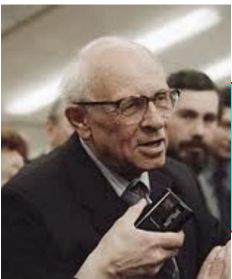

# Similar relationships in exoplanetary systems?

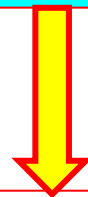

Focusing of DM streams could also occur there, experiencing streaming DM the same way as with our solar system. Planetary focusing in those systems could be initially investigated by searching for the associated stellar activity as a function of the exoplanetary orbital phases ( $\sim$ Longitude).

→ TBD ←

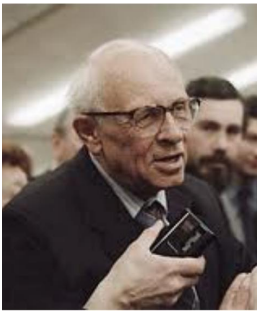

1 example ...

... outside physics →



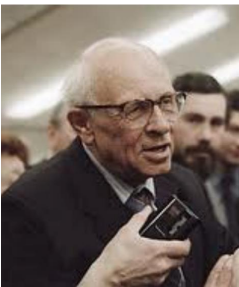

2018

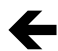

*Melanoma*

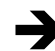

2020

## Planetary Dependence of Melanoma

<http://dx.doi.org/10.1142/S179304801850008X>

## ..a 27 Days Periodicity in Melanoma Diagnosis

<https://doi.org/10.1142/S1793048020500083>

USA <monthly> data 1973-2011

AUSTRALIA daily data 1982-2015

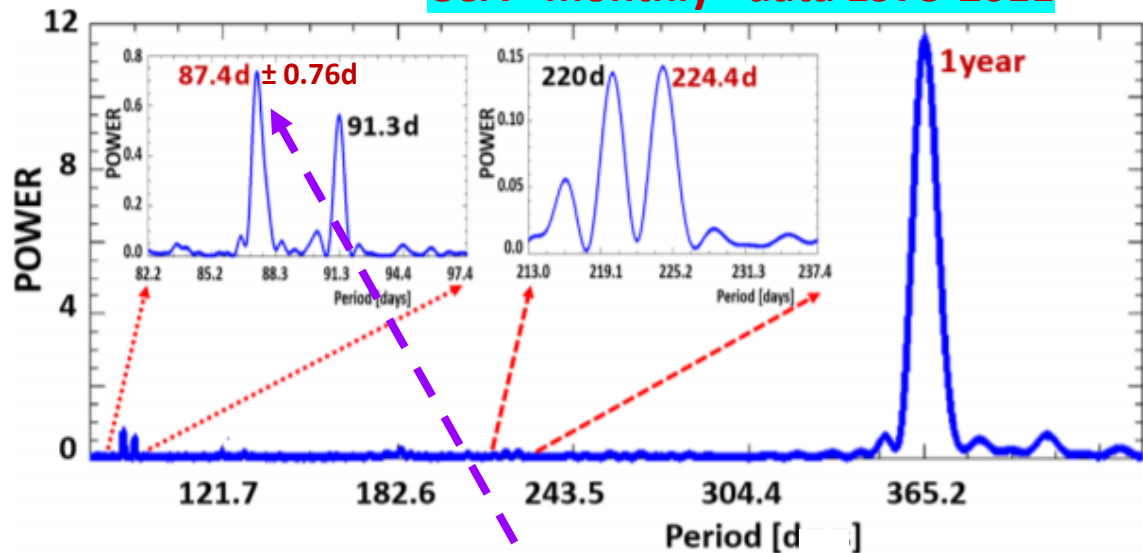

87.97 days

@Mercury's orbit

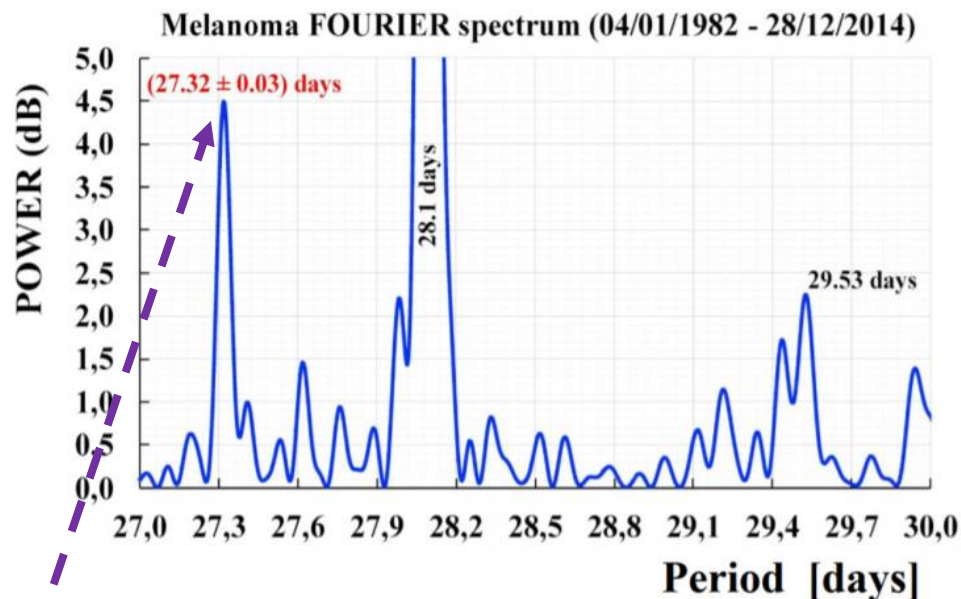

@Moon's orbit 27.32 days (sidereal)

=> fixed to remote stars

*Confirmed independently*

<https://doi.org/10.1142/S1793048019200029>

*Origin: exo-solar!*

# AntiQuark Nuggets (AQNs):

dark matter + missing antimatter + (much) more?

<https://indico.desy.de/indico/event/20012/session/19/contribution/54/material/slides/0.pdf>

N. Raza, L. van Waerbeke, A. Zhitnitsky,  
*Solar Corona Heating by the AQN Dark  
Matter*, [arXiv:1805.01897](https://arxiv.org/abs/1805.01897) (2018),  
Phys. Rev. D 98 (2018)103527

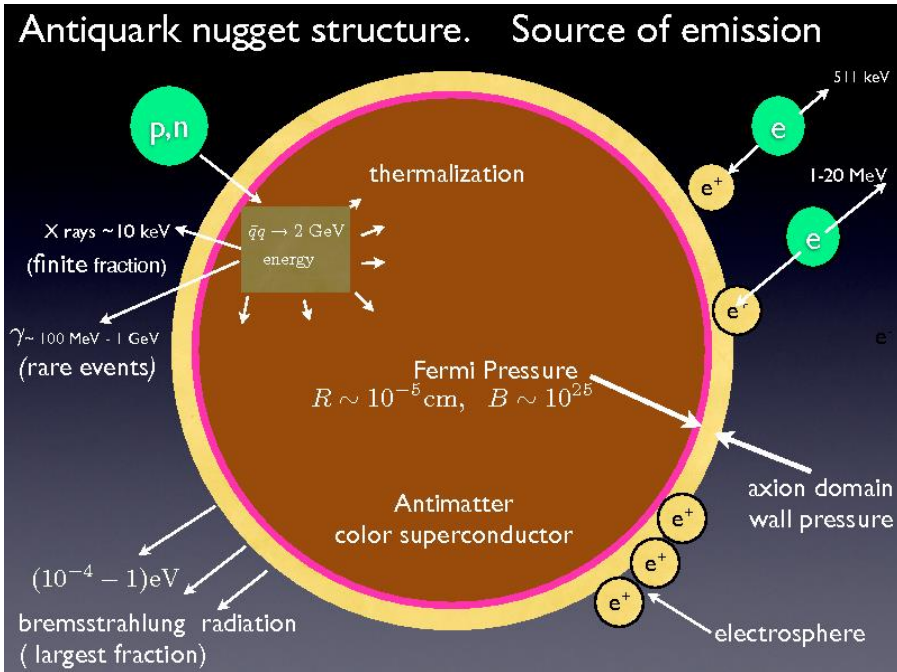

## Candidates:

1. AQNs
2. Magnetic monopoles
3. Dark photons

*Or, a combination from + more.*

# Conclusions

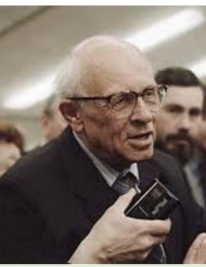

- ✓ Various solar obs's fit planetary gravitational focusing of stream(s) of invisible massive particles ⊗ puzzling solar/terrestrial behaviour:  
Hot Corona, Flares, Elemental composition, MBPs, sunspots, ...?...
- ✓ Similar searches with the dynamic ionosphere (combining with other data underneath).
- ✓ Nature of the invisible particles not identified yet. Possible candidates:
- ✓ **AQNs**, Magnetic monopoles, Dark photons → *inspiring new search strategies*.
- ✓ Underground DM exp's, search for new planetary relationships  
⇒ **Any** ~11yrs relationship suggestive for re-analysis
- ✓ DM searches may profit from temporal signal enhancement up to  $10^{11} \times \Rightarrow$  **no screening?**
- ✓ Tidal effects on the solar surface are excluded ( $\approx 10^{-12} \cdot \text{SUN}_{\text{Gravity}}$ )  
⇒ the planetary working hypothesis: the only viable scheme.
- ✓ More TBD? e.g. various solar / terrestrial obs's + **exosolar planetary systems (!?)**,  
plus *Biomedicine >> first results with melanoma rates encouraging*
- ✓ Ultimate goal: decipher the properties of the streaming DM particles.
- ✓ *novel approaches in ongoing DM searches: design and/or re-analysis*

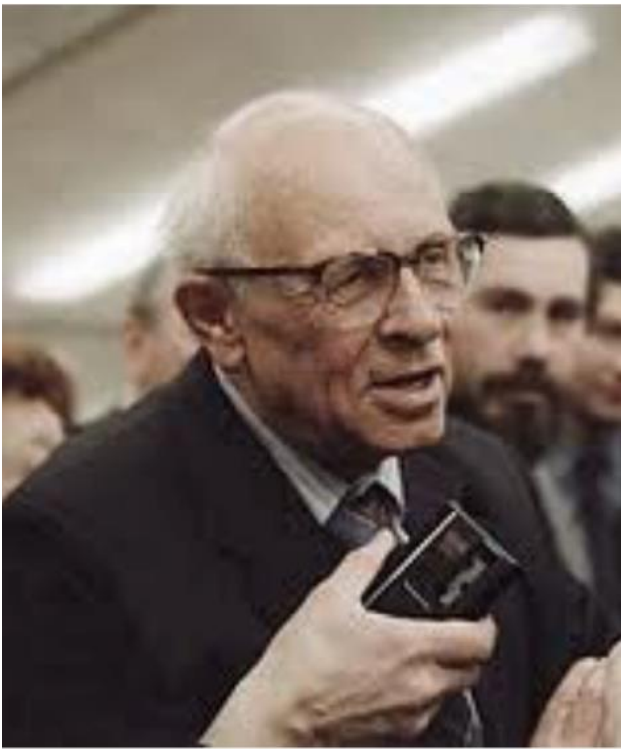

**The Dark World is not dark!**

**THANK YOU**

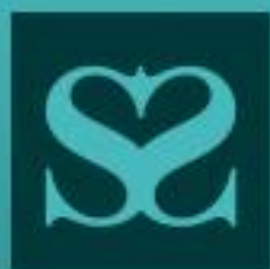

*symmetry*

an Open Access Journal by MDPI

IMPACT  
FACTOR  
2.645

# The Dark Universe: The Harbinger of a Major Discovery

## Guest Editor

Prof. Konstantin Zioutas

## Deadline

31 August 2021

# Special Issue

[mdpi.com/si/69375](https://mdpi.com/si/69375)

Invitation to submit

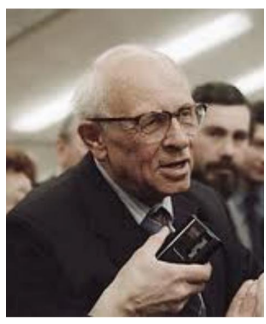

**Additional slides**



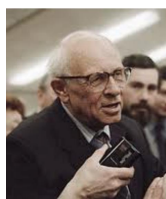

## Earth's Atmosphere

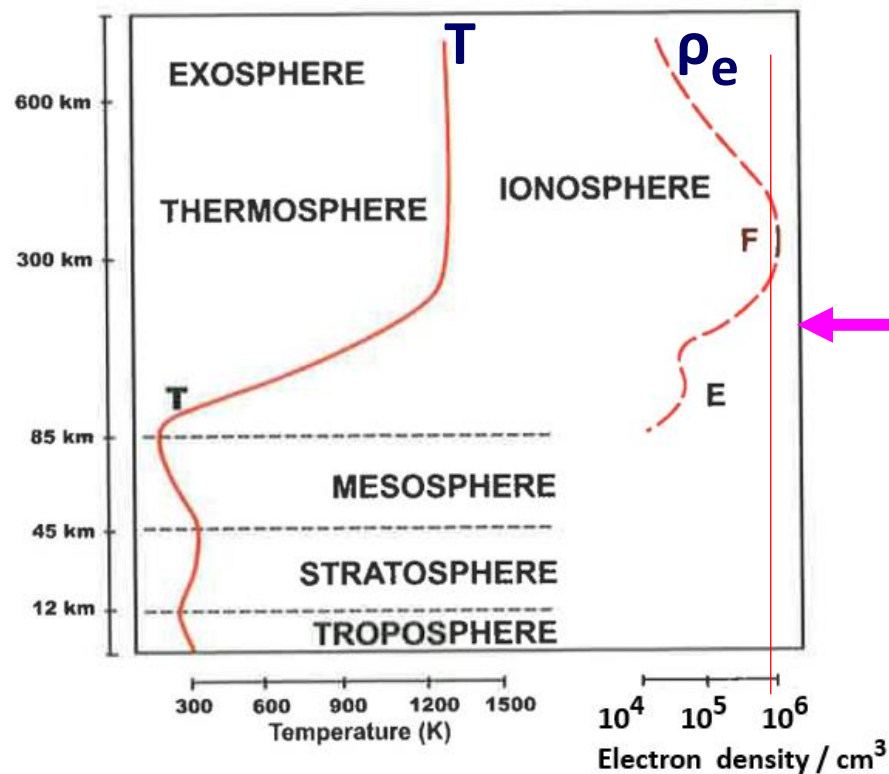

## Chromosphere $\leftrightarrow$ Corona

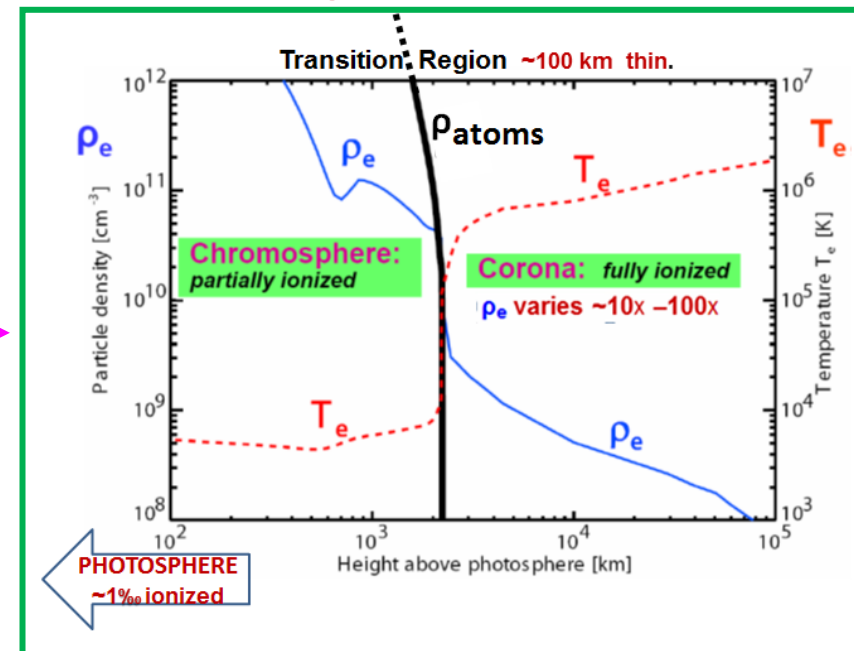

THE SUN, L. Golub, J.M. Pasachoff, REAKTION BOOKS / THE SCIENCE MUSEUM, LONDON 2017

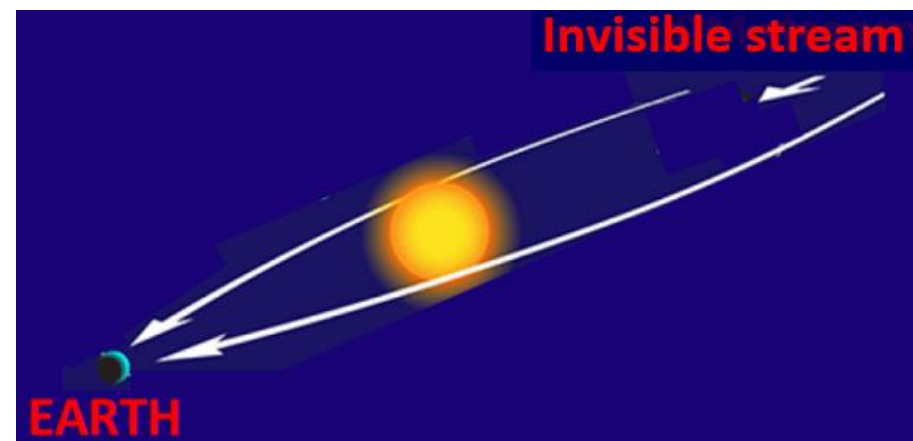



# Planetary Dependence of Melanoma

<http://dx.doi.org/10.1142/S179304801850008X>

USA <monthly> data 1973-2011

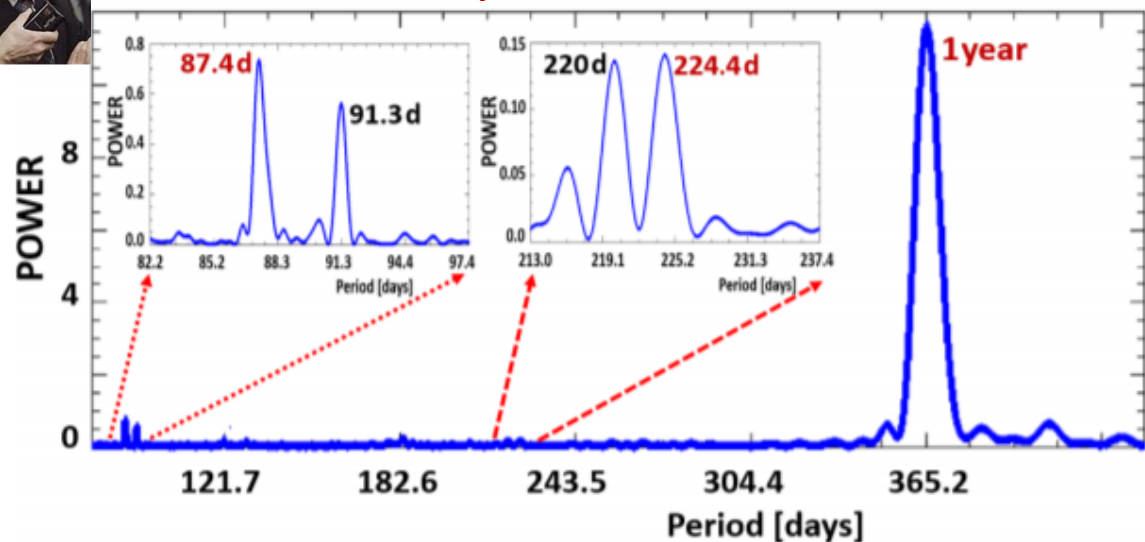

Adding up consecutive  $5 \times 88 \text{ d} \Rightarrow 440 \text{ days}$ :

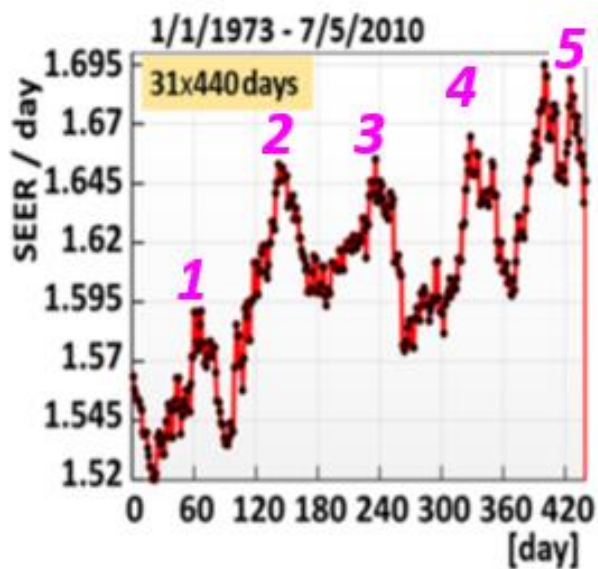

# ..a 27 Days Periodicity in Melanoma Diagnosis

<https://doi.org/10.1142/S1793048020500083>

AUSTRALIA daily data 1982-2015

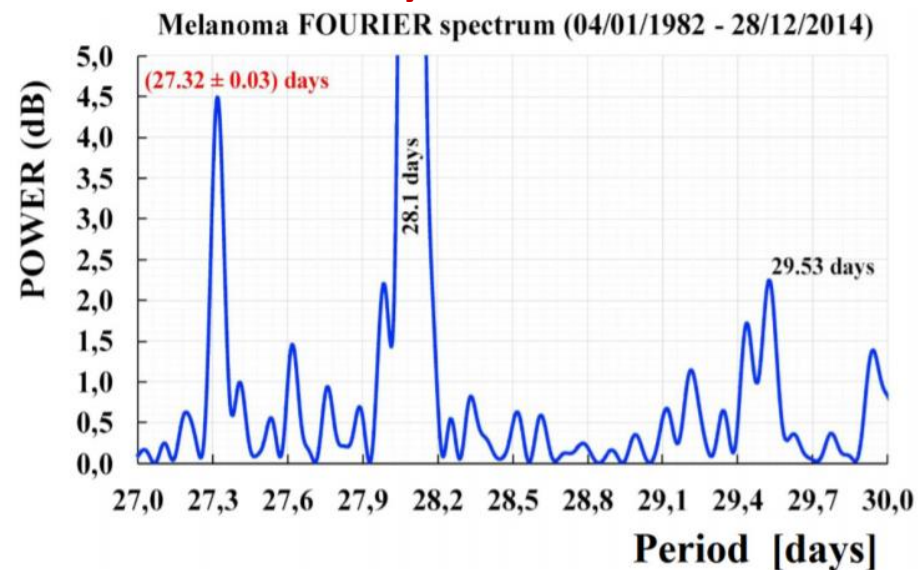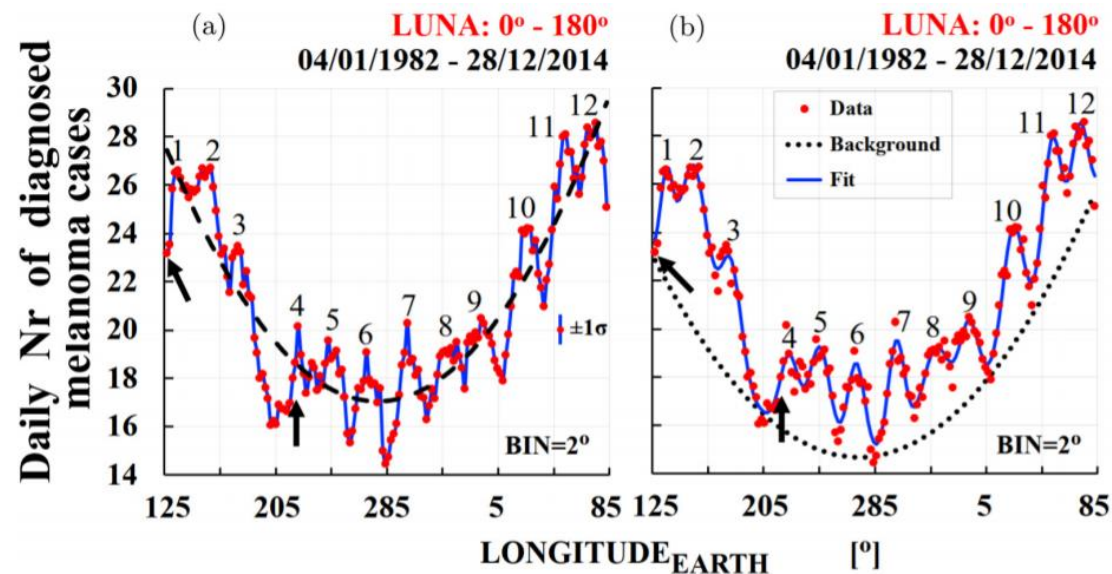

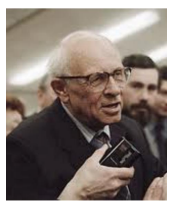

# Full disk: Solar EUV

MERCURY

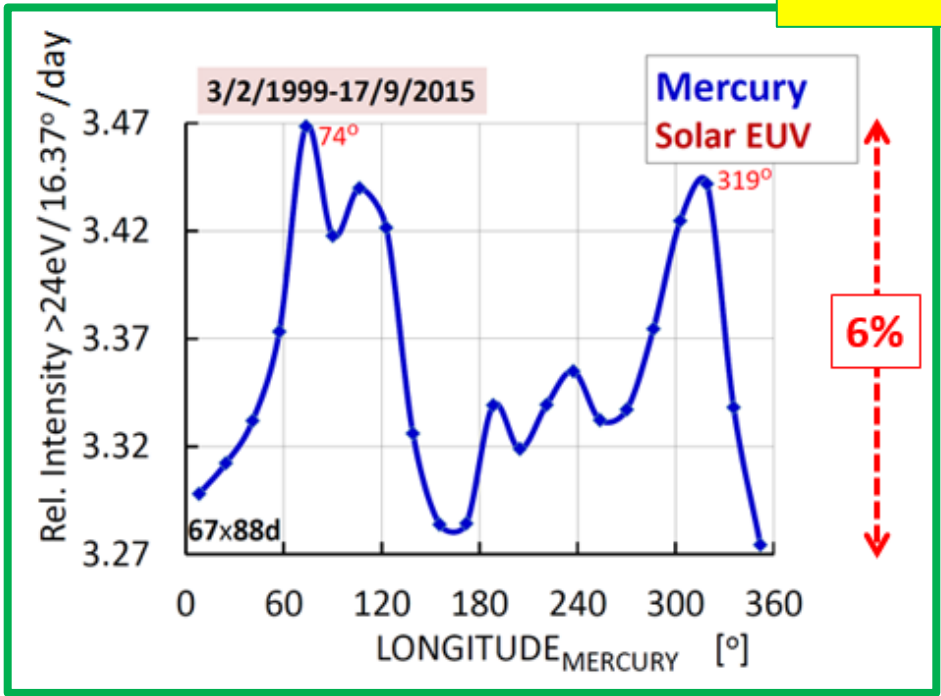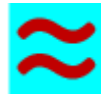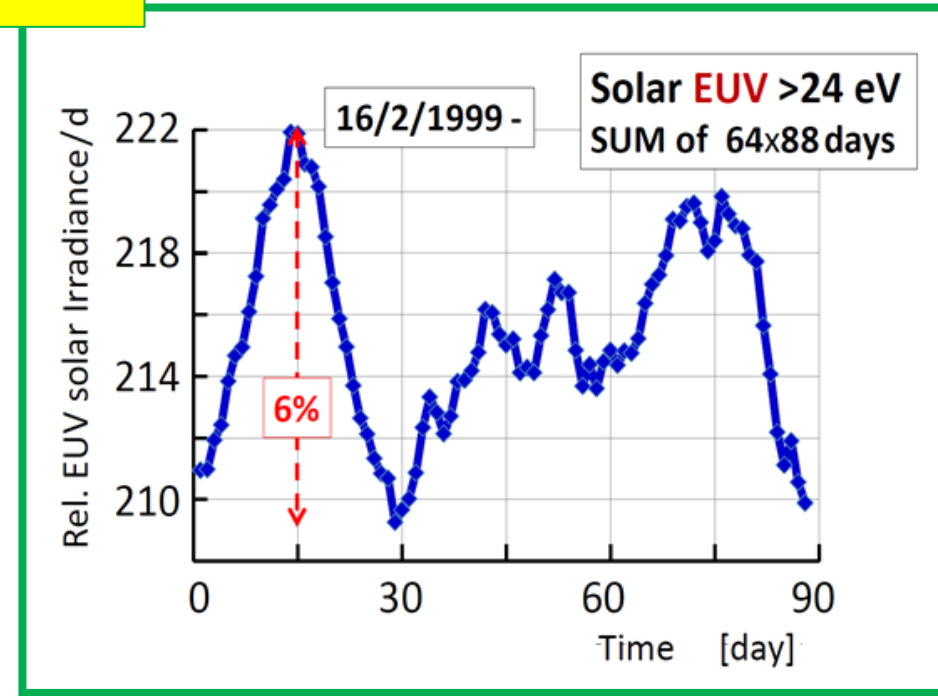

Analysis code #1

Analysis code #2



## Chromosphere ↔ Corona

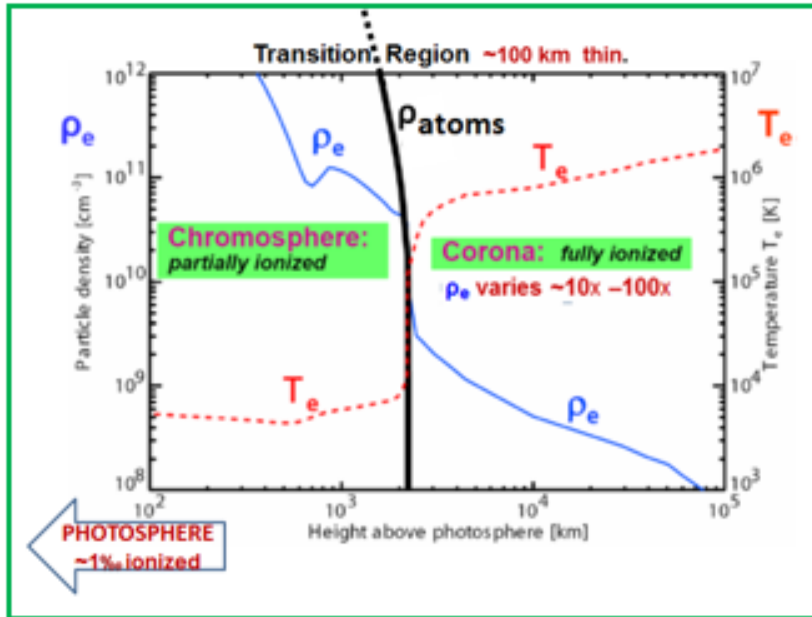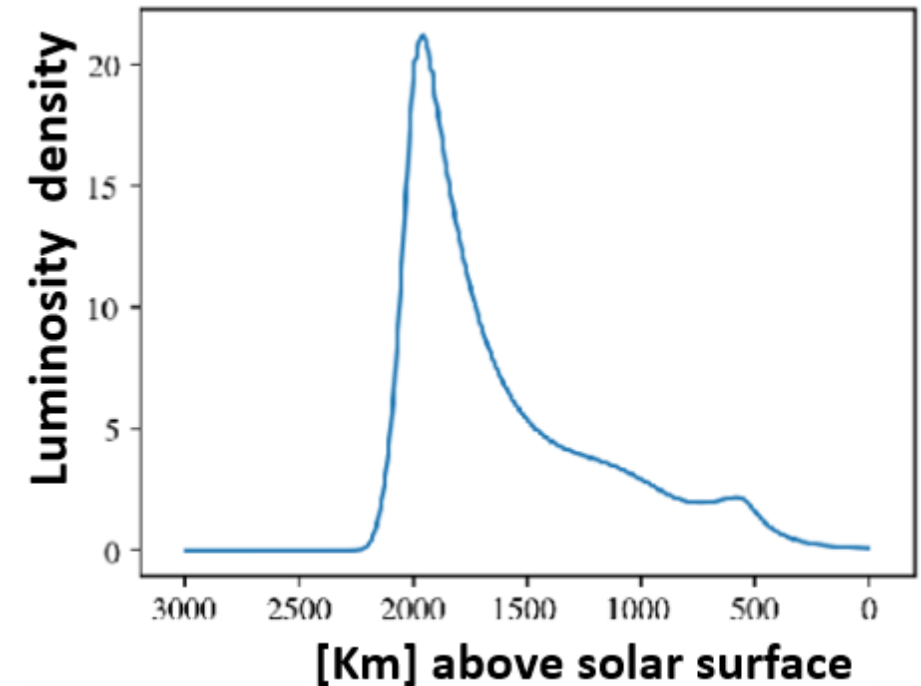

- AQNs:**
- ♦ *the only solar atmospheric model explaining the ~100 km thin Transition Region*
  - ♦ *planetary dependence of the flaring Sun*
  - ♦ *more? >>> unexplained obs'?!*



# “Solar Cycle Variations of Rotation + Asphericity in the Near-Surface Shear Layer”

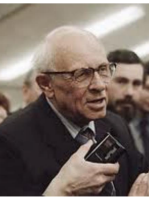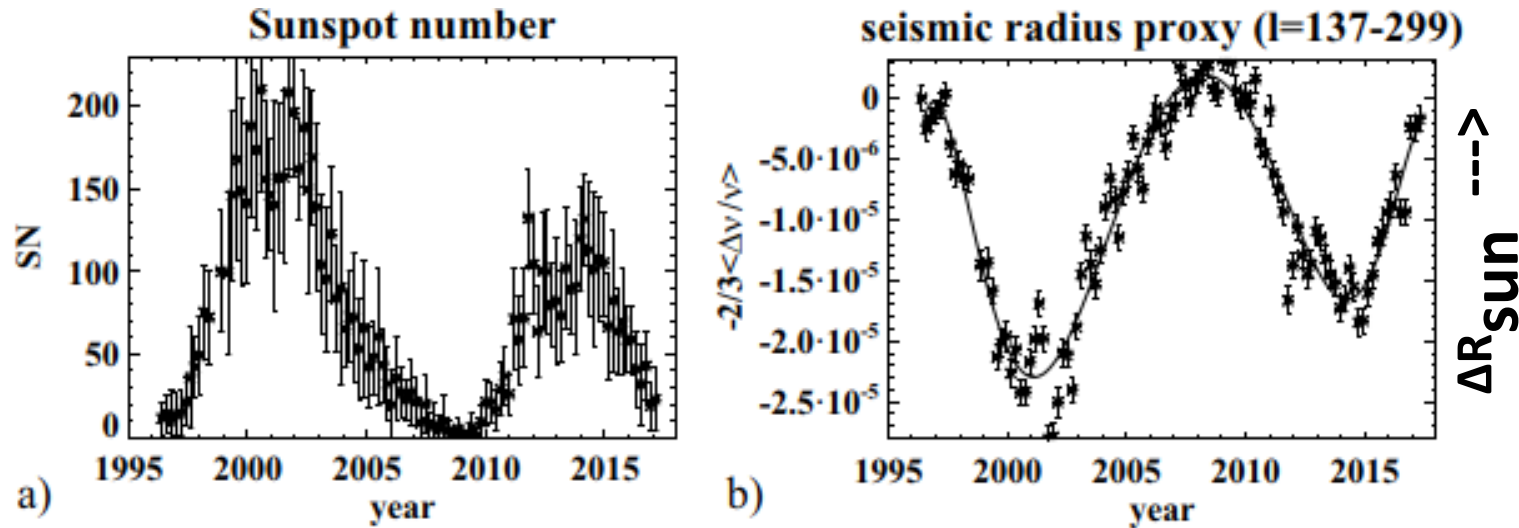

<https://spaceweatherarchive.com/2018/09/27/the-chill-of-solar-minimum/> **Sept. 2018**

Figure 3: a) The sunspot number, SN, averaged for the 72-day periods corresponding to the intervals of the helioseismic analysis. b) Variations of the seismic radius proxy (Eq. 3) relative to the first measurement in 1996, as deduced from the analysis of the f-modes extracted from the MDI and HMI data from 1996 to 2017. The relative amplitude modulation of about  $-2.3 \times 10^{-5}$  in Solar Cycle 23 and about  $-1.7 \times 10^{-5}$  in Cycle 24 is clearly in anti-phase with the solar activity. The error bars show three standard deviations calculated using observational error estimates of the mean f-mode frequencies.





NO synod

Σ Nr. of Sunspots/22 days

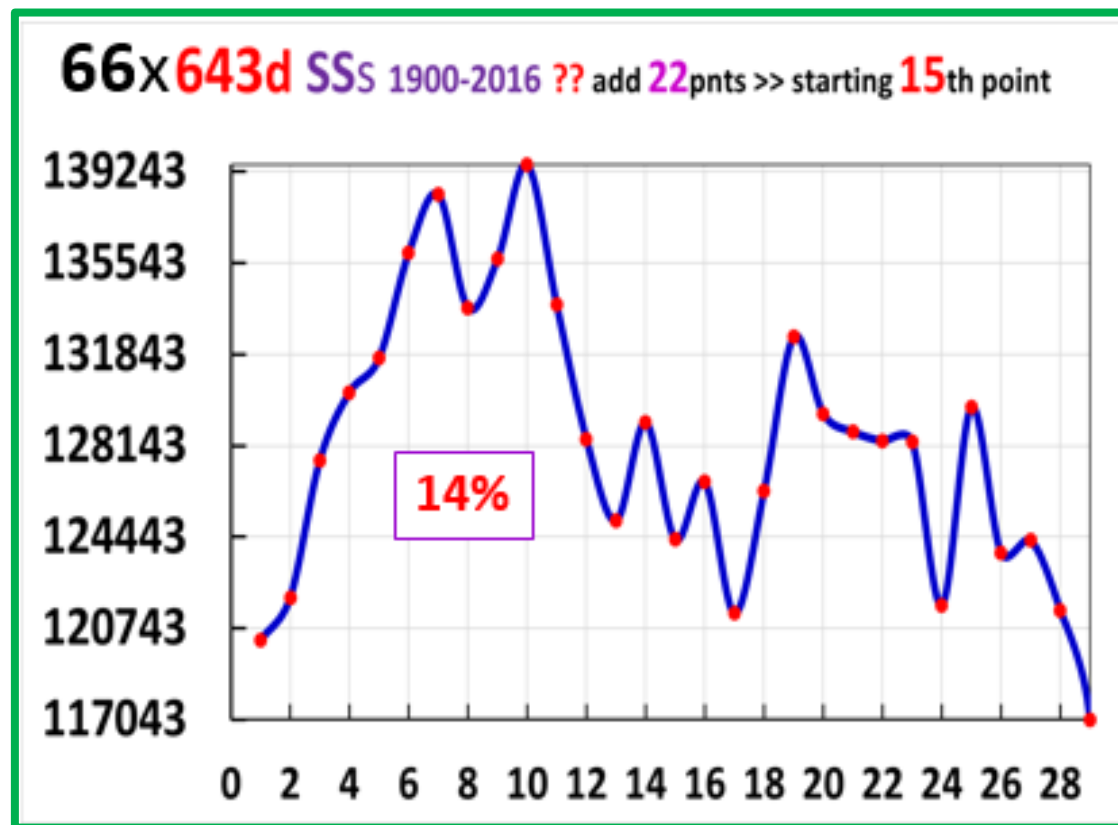

66× 643 days

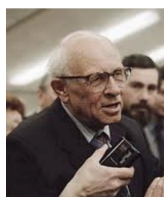

| Date [UTC] |            |
|------------|------------|
| Minimum    | Maximum    |
| 07/12/1963 | 22/08/2017 |

| F10.7 [cm] |         |
|------------|---------|
| Minimum    | Maximum |
| 0,0        | 400,0   |

| BIN Size [degrees] |
|--------------------|
| 8                  |

| Planet | Planetary Longitude Range [degrees] |         |
|--------|-------------------------------------|---------|
| Target | Minimum                             | Maximum |
| ☿      | MERCURY:                            |         |
|        | 0                                   | 360     |
| ♀      | VENUS:                              |         |
|        | 200                                 | 320     |
| ♁      | EARTH:                              |         |
|        | 0                                   | 360     |
| ♂      | MARS:                               |         |
|        | 0                                   | 360     |
| ♃      | JUPITER:                            |         |
|        | 0                                   | 360     |
| ♄      | SATURN:                             |         |
|        | 0                                   | 360     |
| ♅      | LUNA:                               |         |
|        | 0                                   | 360     |

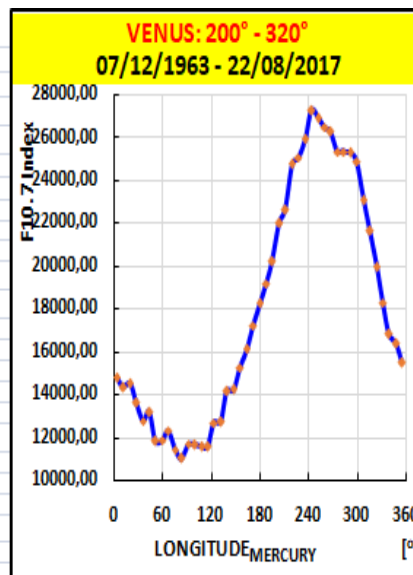

| RUN |  | Integral: Flares Class | Integral: Nr of M-Flares | Class / Nr of M-Flares |
|-----|--|------------------------|--------------------------|------------------------|
|     |  | 807038,2               | 6572                     | 122,7995               |

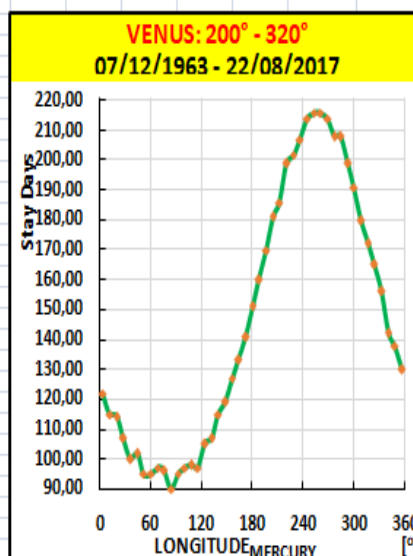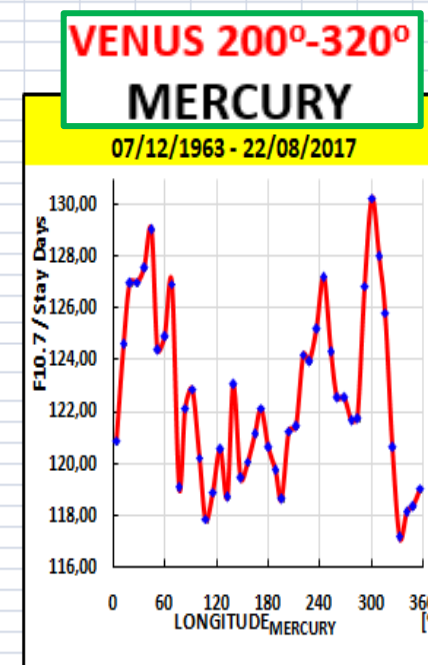

**10%**  
Min <-> Max Value

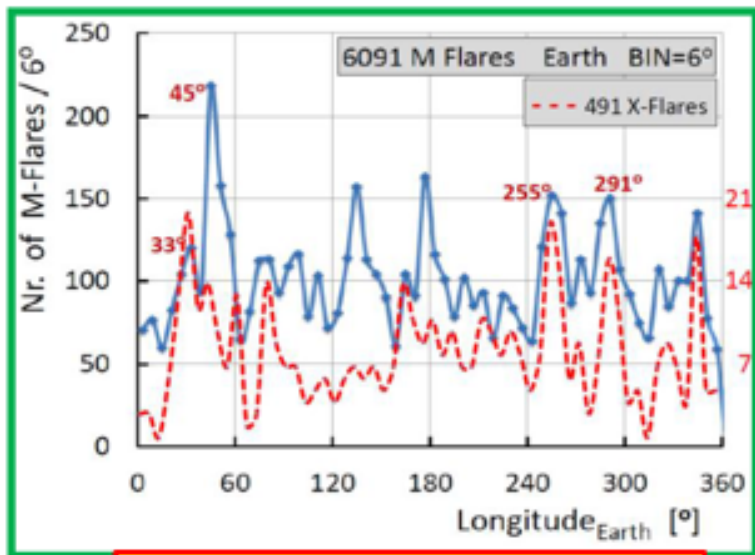

**Longitude-EARTH =>**

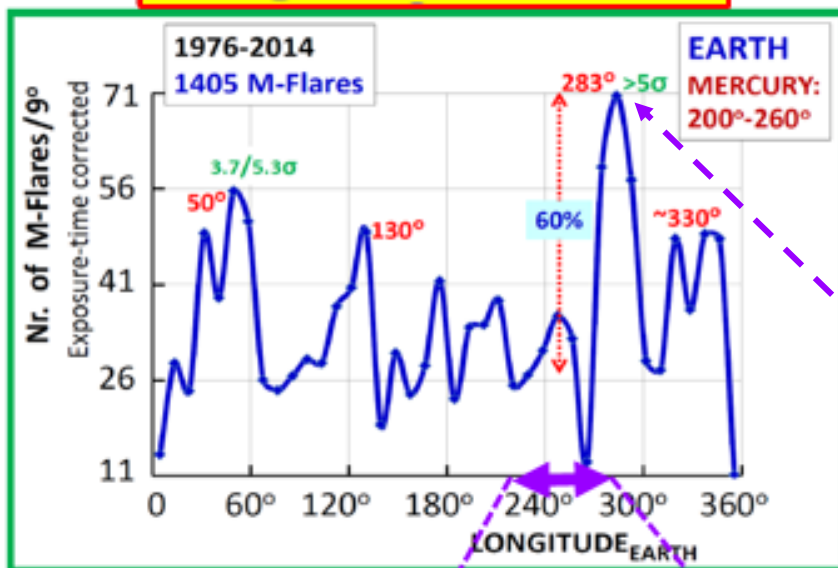

**MERCURY**

**ALL M-Flares**

**1405 M-Flares**  
**Mercury:**  
**200°-260°**

**Stream from Galactic Centre mega-BlackHole?**

Heliocentric longitude  $\approx 266^\circ + \text{TOF (Earth} \Rightarrow \text{Sun)}$

**→ 18<sup>th</sup> December**

**EARTH**

**EARTH**

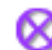

**MERCURY**



## UNIVERSE

$\sim 10^5$  years

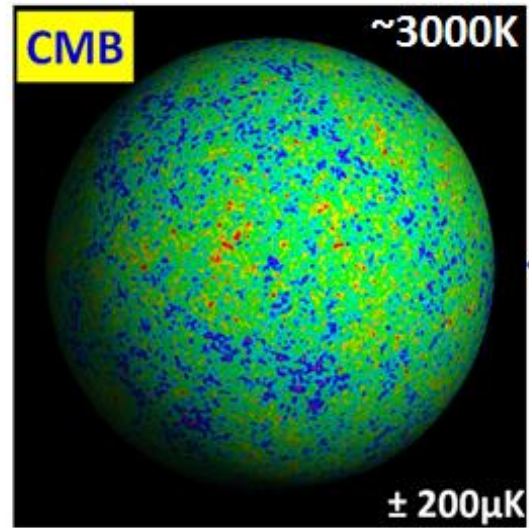

$$\Delta T/T \sim 10^{-5}$$

## SUN

$\sim 10^9$  years

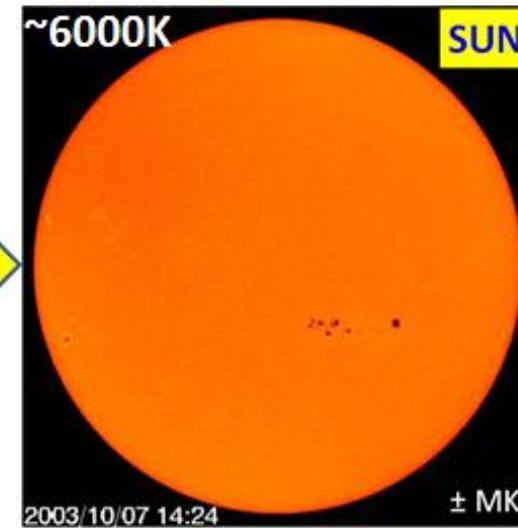

$$\Delta T/T \sim 10^{+3}$$

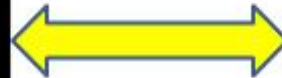

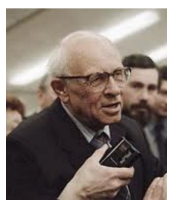

# Gravitational (self)-focusing

Sun => Cosmic Telescope + amplifier

Gravit. focusing: Sun + planets

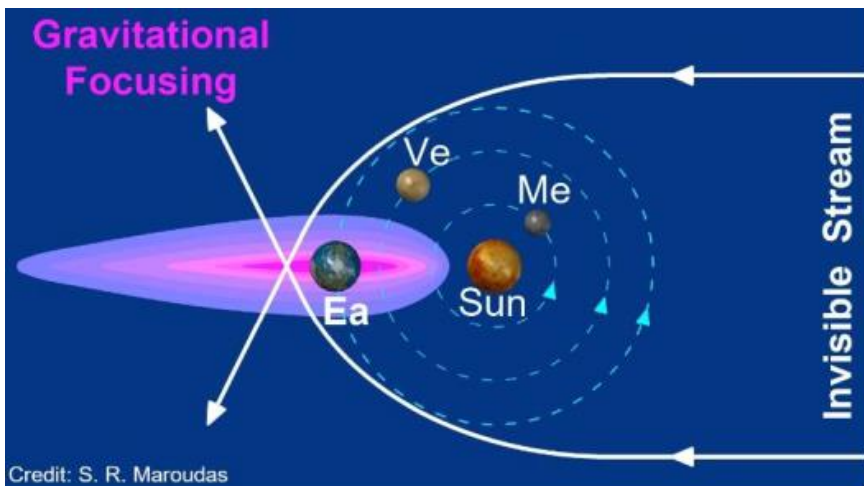

Gravit. (self)-focusing

+

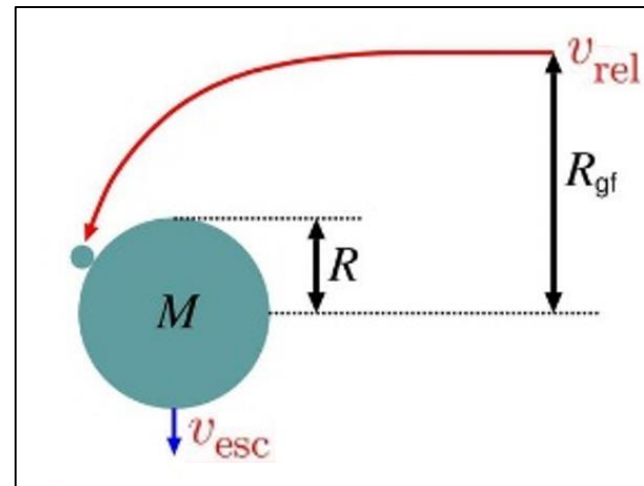

In collaboration with  
**Adrien Leleu** / Bern :

2 peaks ~180° apart!

$$\Delta\Phi = \frac{4MG}{bc^2}$$

**b** = impact factor  
**C** = velocity

$$\sigma_{\text{trap}} = \pi R^2 \left( 1 + \frac{v_{\text{esc}}^2}{v_{\text{rel}}^2} \right)$$

SUN: **v<sub>esc</sub>** = 612 km/s



# Evidence for a New Component of HE Solar $\gamma$ -Ray Production

**Fermi-LAT  
2008-2017**

The observed multi-GeV  $\gamma$ -ray emission from the solar disk—sourced by hadronic cosmic rays interacting with gas and affected by complex magnetic fields—is **not understood** ... **Most strikingly**, although six  $\gamma$  rays above 100 GeV were observed during the 1.4 yr of solar minimum, none were observed during the next 7.8 yr. These features, along with a 30–50 GeV dip ... were **not anticipated by theory**.

To understand the underlying physics, Fermi-LAT + HAWC obs's of the imminent ... solar Minimum are crucial.

Our work:

**>>> search for planetary dependence!**

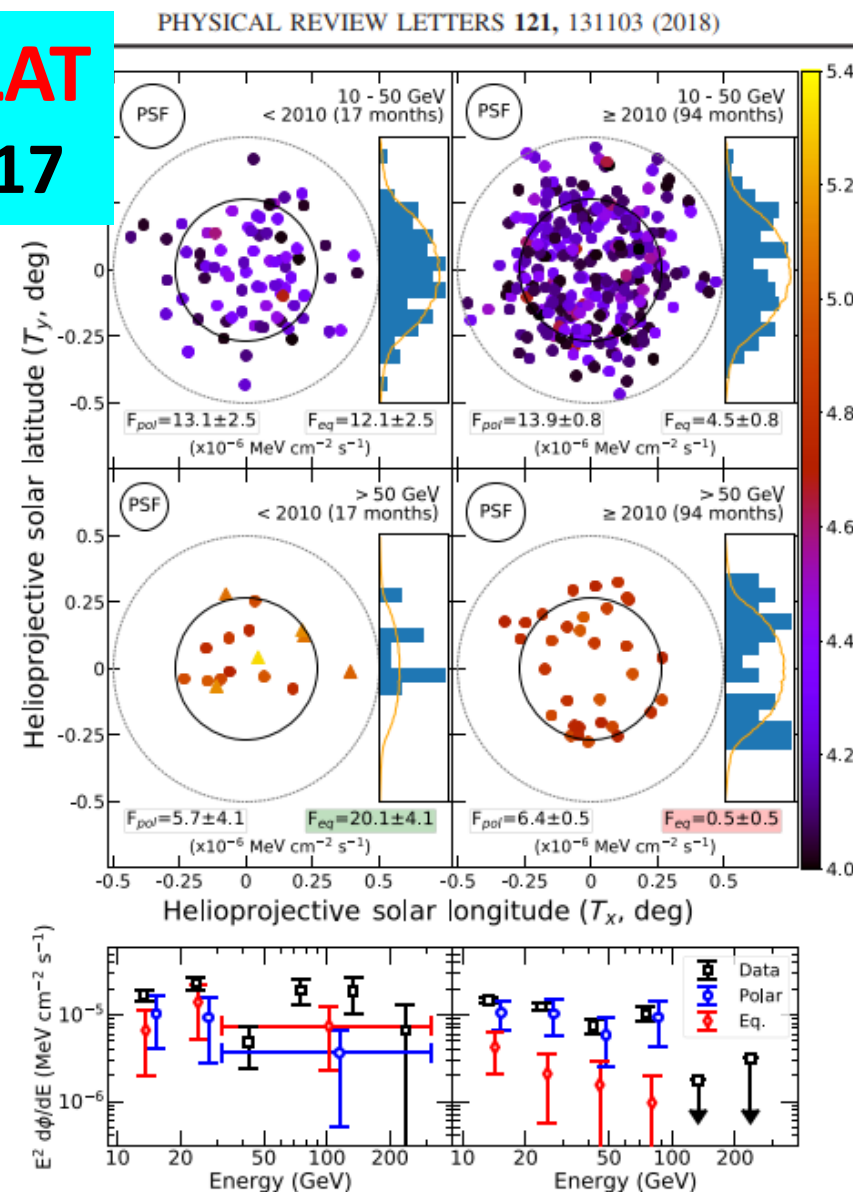

FIG. 2. (Top panel) The location and energy of solar  $\gamma$  rays in helioprojective coordinates. Data are cut into two temporal and two energy bins. The solid disk indicates the solar circle, and the dashed circle indicates the 0.5° ROI. The average 68% containment region of  $\gamma$  rays in each bin is depicted at the top left. The histogram depicts the  $T_y$  positions of photons compared to the expectation from isotropic solar emission smeared by the PSF (orange line). Events > 100 GeV are marked with triangles rather than circles. We stress that the exposure after solar minimum significantly exceeds the exposure during solar minimum. Thus, the observed number of counts does not indicate the relative flux. In each bin, we report the flux from the modeled polar and equatorial components, as described in the text. (Bottom panel) The energy spectrum of polar and equatorial emission, divided into regions during (left) and after (right) solar minimum. The polar emission is approximately constant, while the equatorial emission decreases drastically after solar minimum.

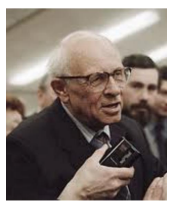

**Wolf, 1859:** *solar dynamics is partially driven by **planetary tides**.  
**a plausible physical mechanism has not been discovered yet...**  
the planetary tidal forces are too small to modulate solar activity..  
although more complex mechanisms can not be excluded.*

N. Scafetta, J. Atm. & Sol.-Terr. Phys. 81–82(**2012**)27

Critical Analysis .. of the Planetary Tidal Influence on Solar Activity

We found ... **artefacts** caused by the calculation algorithm ...

We conclude: the considered hypothesis [A.&A. 548(**2012**) A88]

**is not based on a solid ground.** S. Poluianov, I. Usoskin, Sol. Phys. 289 (**2014**) 2333



# Solar Corona 1939- >>> observational **mystery**.

***Sun's upper atmosphere much hotter than its surface => why?***

- "a major open issue in astrophysics" 2015
- "one of the fundamental outstanding problems in solar physics" 2015
- **"for 77 years...one of the outstanding unsolved problems in astrophysics"** 2015

[ <http://arxiv.org/abs/1502.07401> ; <http://arxiv.org/abs/1508.05354>; DOI: 10.1098/rsta.2014.0269]

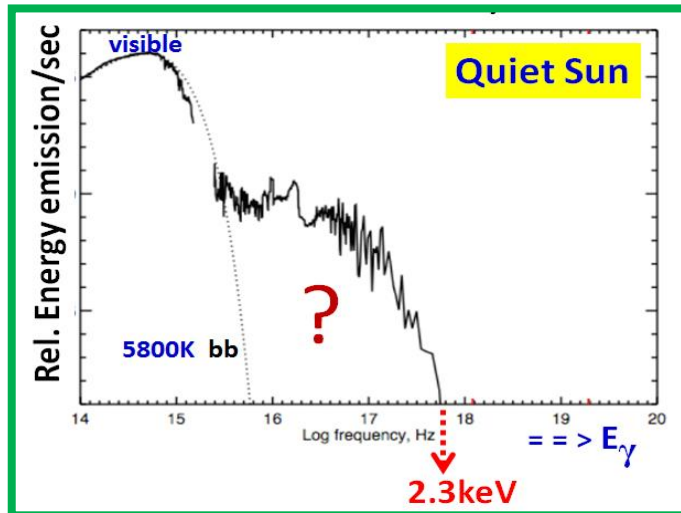

The striking **EUV excess** of the quiet Sun is the manifestation of the **solar corona problem**.

H.S. Hudson

## Zur Frage der Deutung der Linien im Spektrum der Sonnenkorona.

nachdem schließlich die Anzeichen dafür sich mehr und mehr verdichten, daß in den äußeren Zonen der Sonnenatmosphäre Bedingungen für die Anregung von Spektrallinien vorliegen, die weit über das hinausgehen, was bei thermischem Gleichgewicht zu erwarten wäre, scheint es nicht mehr völlig abwegig, die Frage zu diskutieren, ob die Koronalinien als verbotene Linien hochionisierter Atome zu deuten sind.

16. März 1939

W. GROTIAN

<http://dx.doi.org/doi:10.1007/BF01488890>



# Earth's Atmosphere 1937

- ...peak electron density around December is greater than around June  $\neq$  expectation  
**a long-standing unexplained annual anomaly**
- “the writers are inclined to the view that the cause is associated with the Earth **or its motion...**” 1938  
[doi:10.1029/TE043i001p00015](https://doi.org/10.1029/TE043i001p00015)
- .. there is a global **annual anomaly**.

J. Lean *et al.*, J.G.R. 116 (2011) A10318, [doi:10.1029/2011JA016567](https://doi.org/10.1029/2011JA016567)

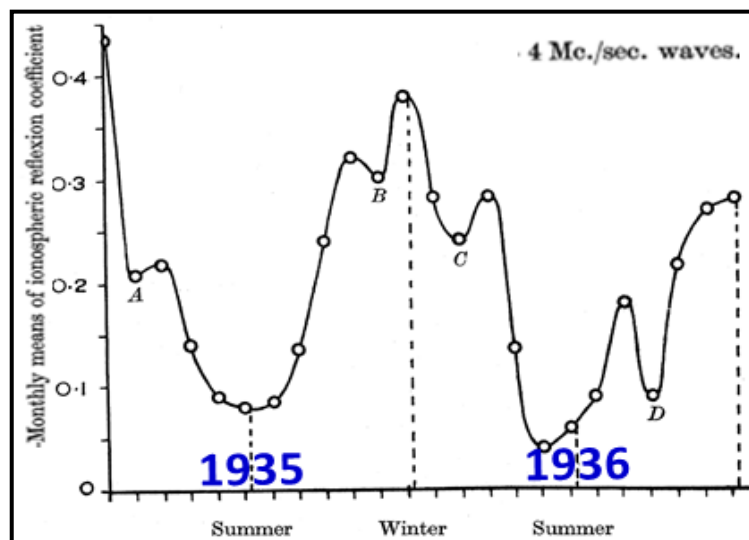

Proc. Roy. Soc. London A162 (1937) 451

Total Electron Content  
**Dec June**  
2.87 2.12 [ $10^{32} \text{e}^- \text{s}$ ]

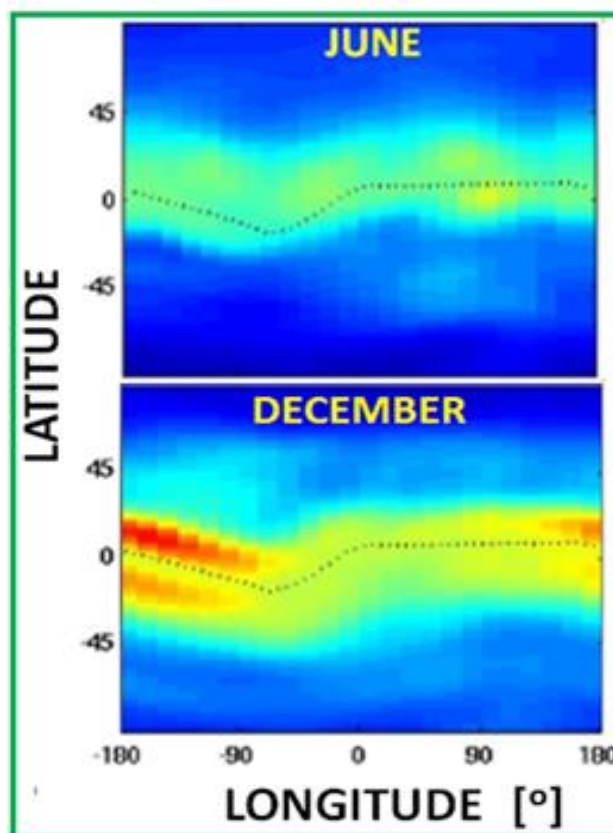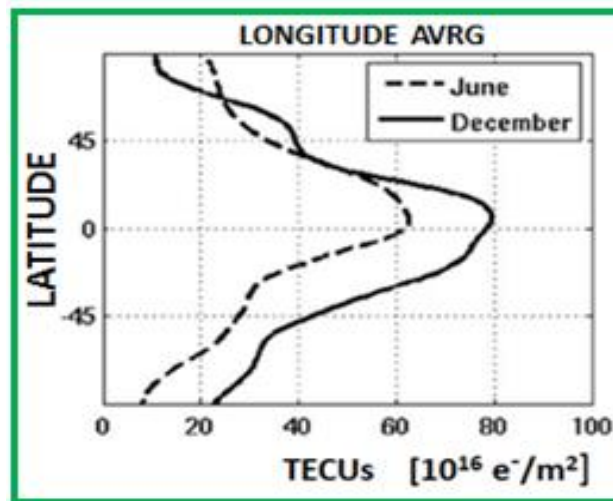

J. Atm. Sol.-Terr. Phys. 67 (2005) 1377



## EARTH

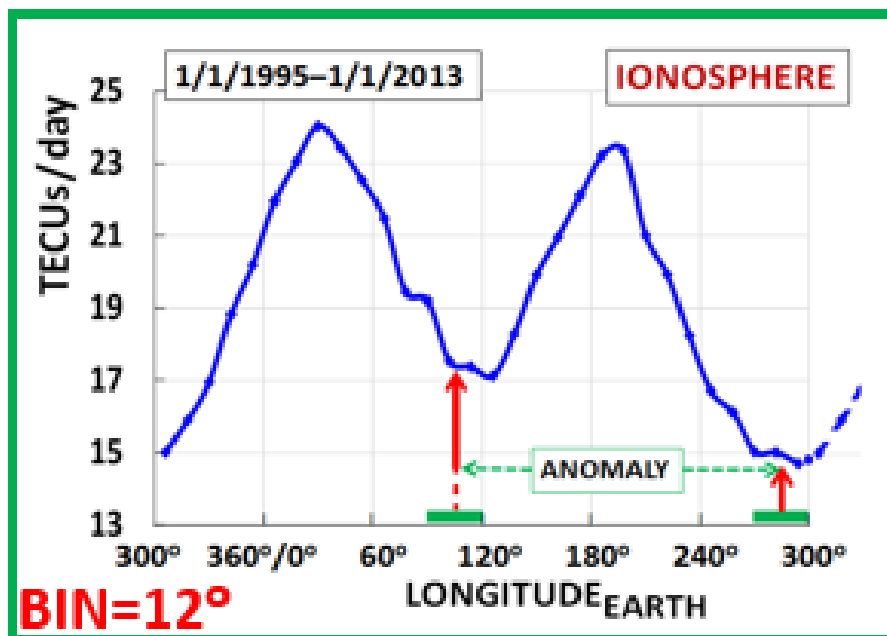

## EARTH ⊗ MOON<sub>PHASE</sub>

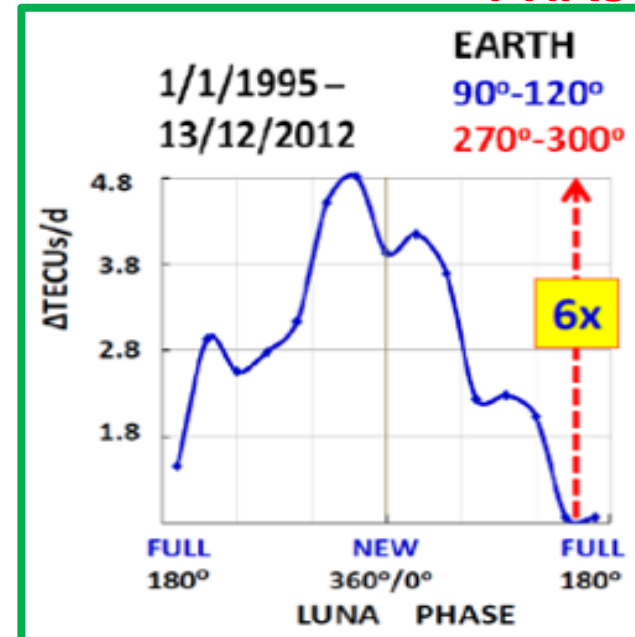

### Stream(s) from G.C. mega-Black Hole?

Longitude  $\approx 266^\circ + \text{TOF (Earth} \Rightarrow \text{Sun)}$

$\rightarrow 18^{\text{th}}$  December

Longitude  $\approx 85^\circ + \text{TOF (Moon} \Rightarrow \text{Earth)}$

$\rightarrow 17^{\text{th}}$  June, ..?..



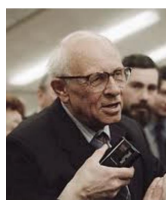

# EARTH'S IONOSPHERE

Anomalies lasting for some decades

>>> First obs' 1937/1938

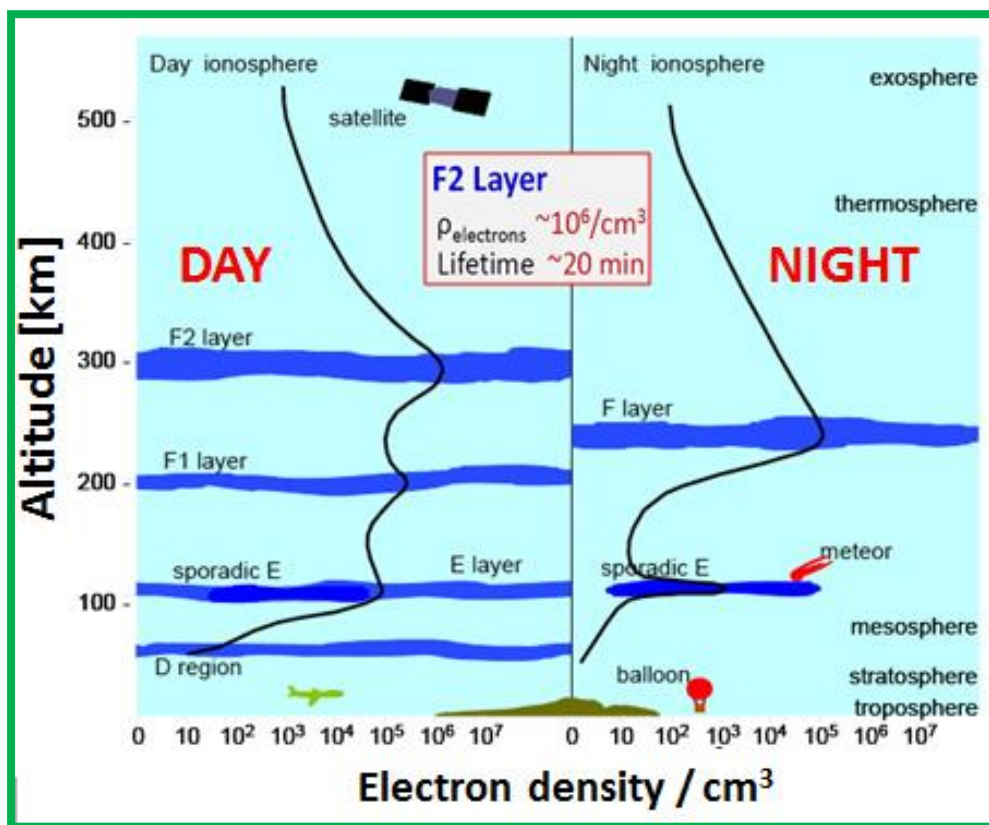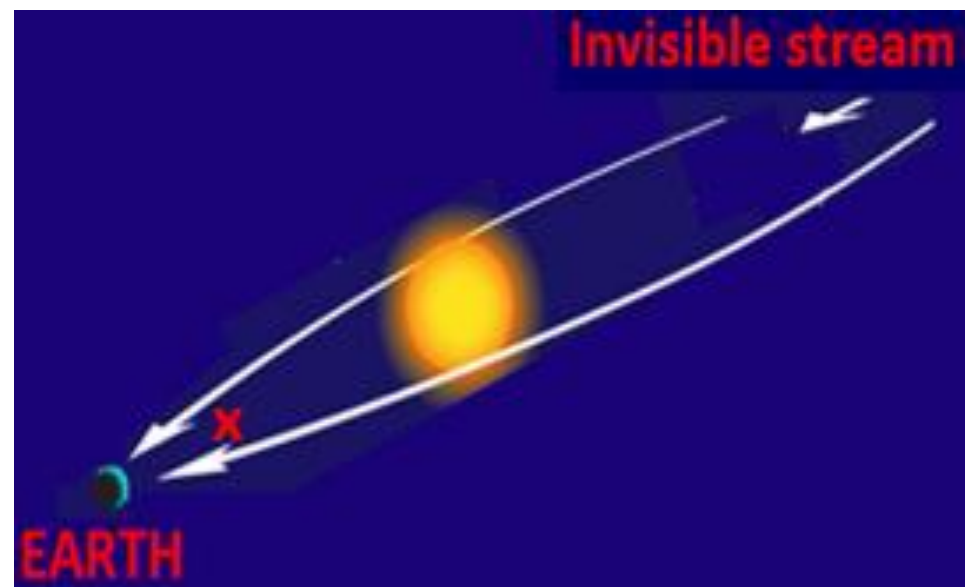

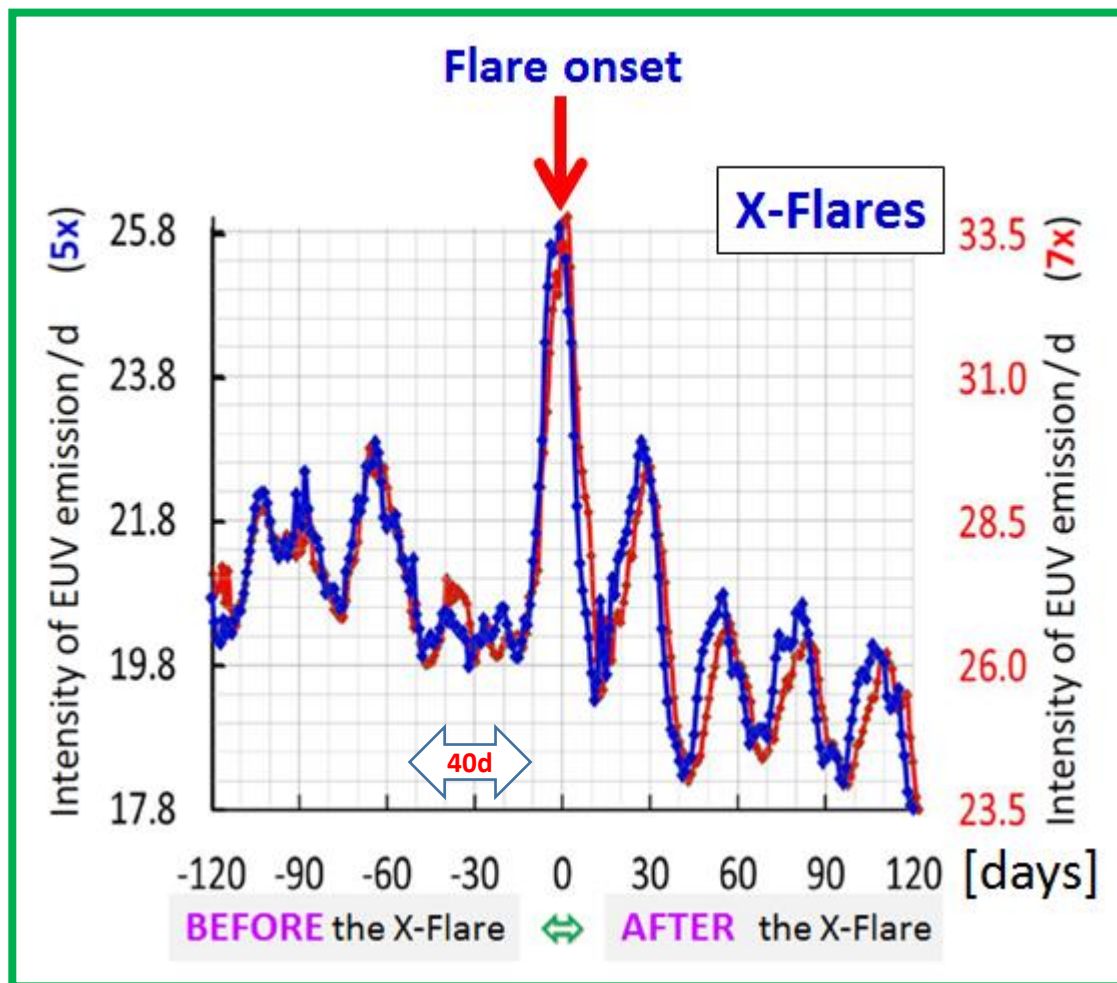

EUV  
⊗  
X-Flares

12%



### 2312 M-Flares

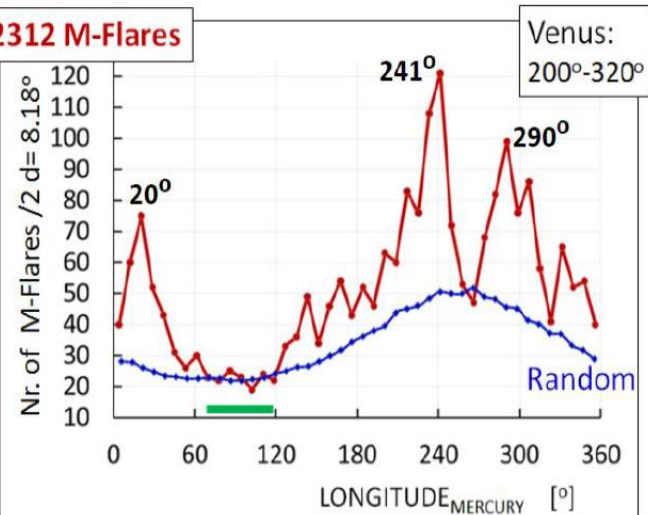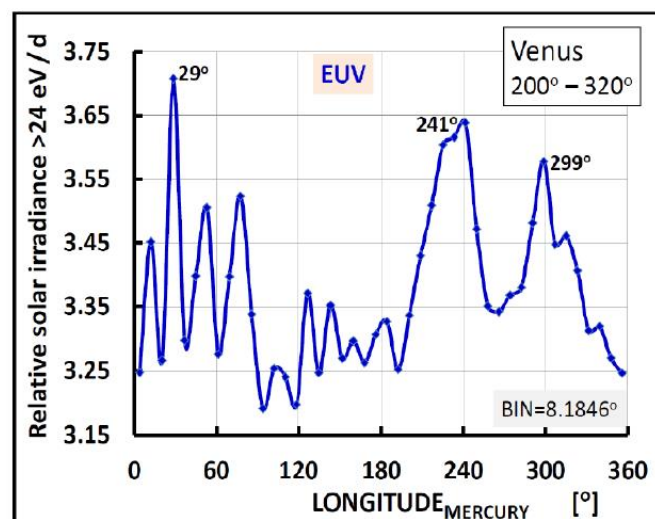

### 1701 M-Flares

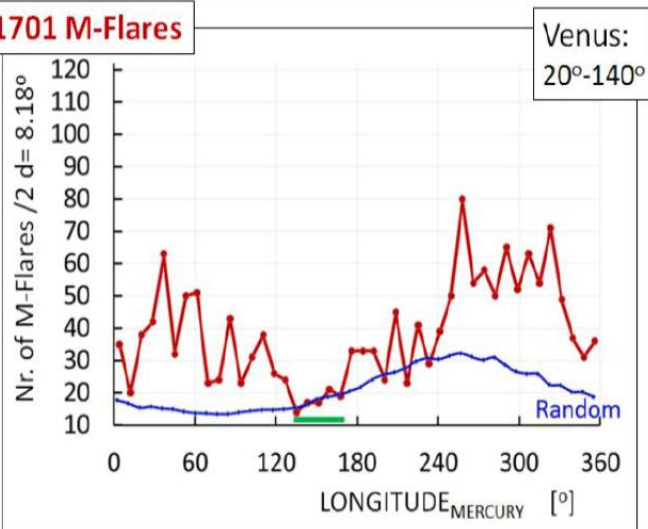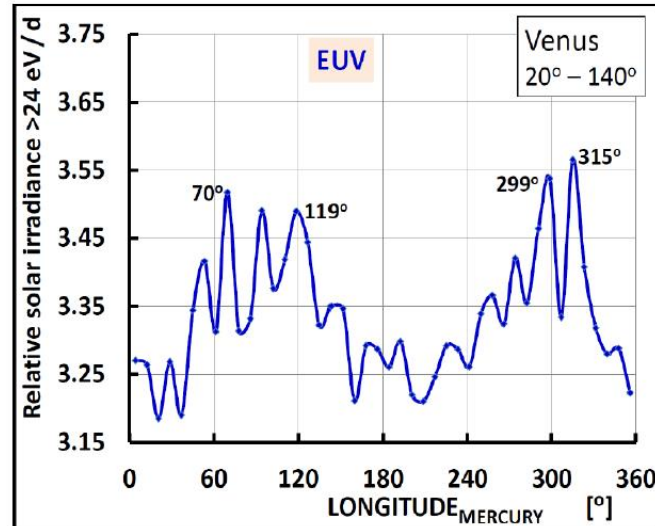

MERCURY

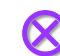

VENUS  
FLARES/EUV



EARTH

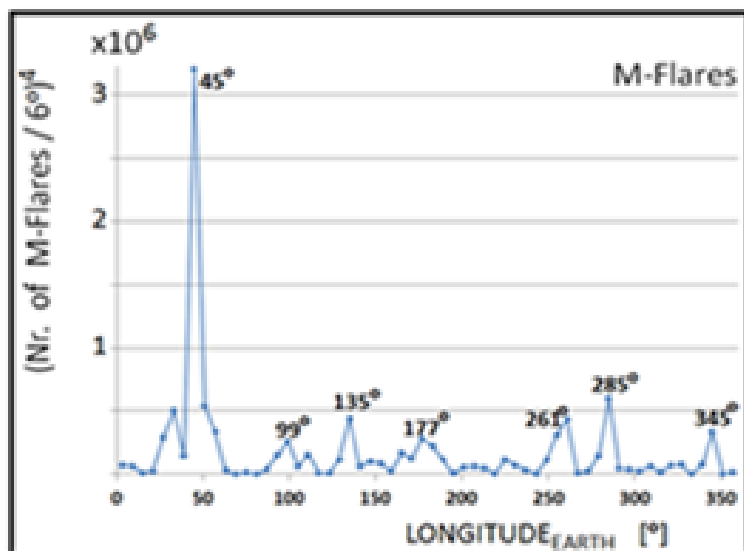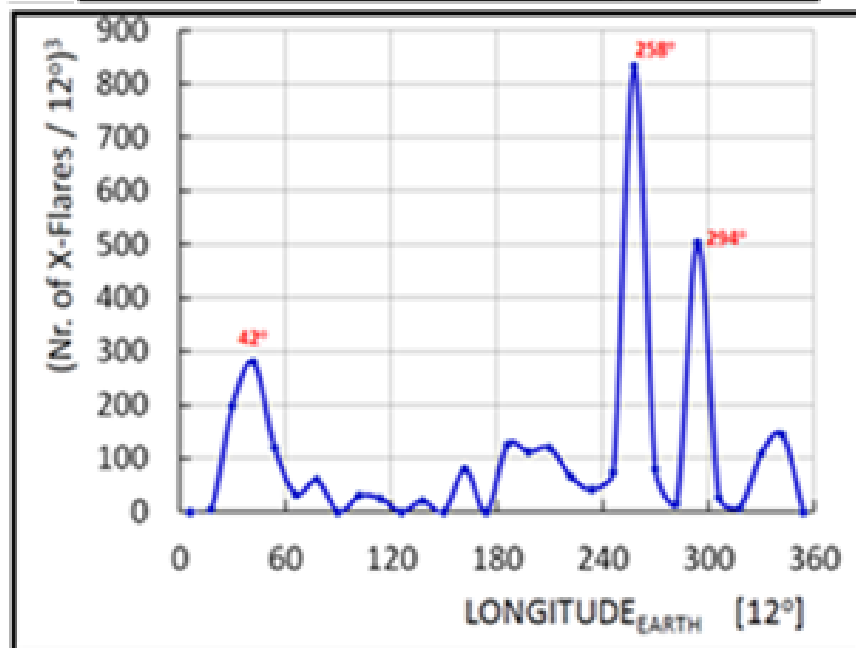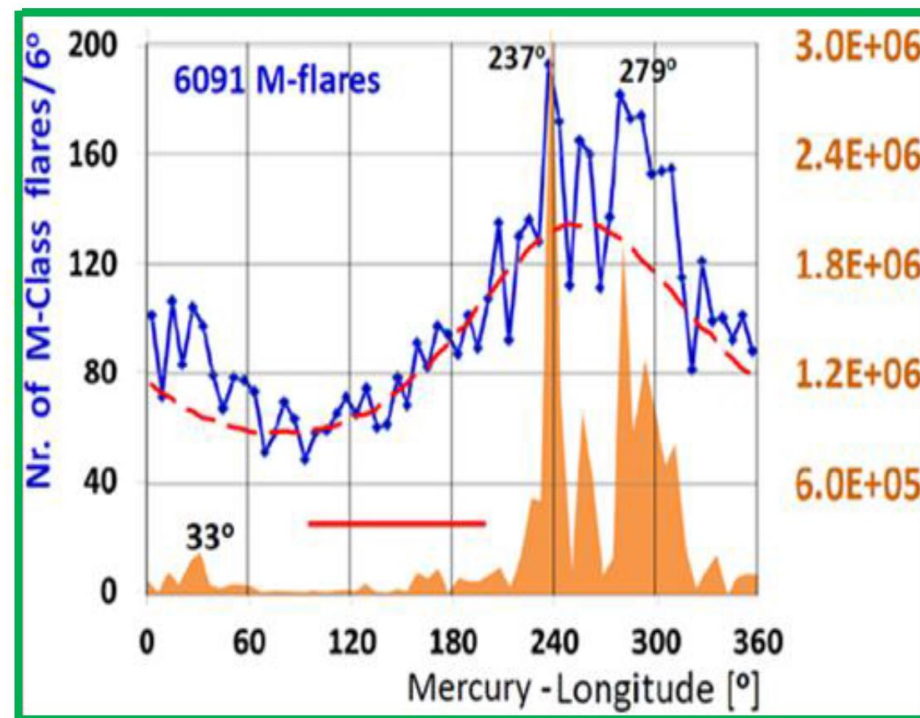

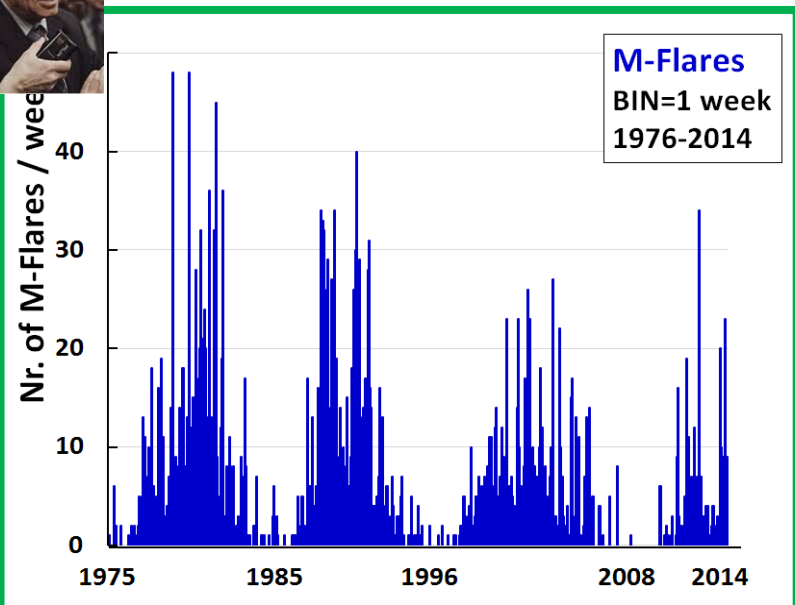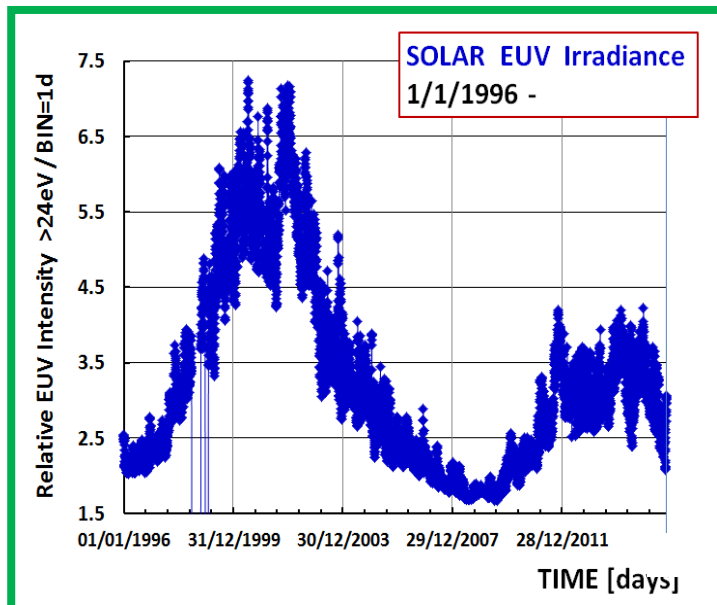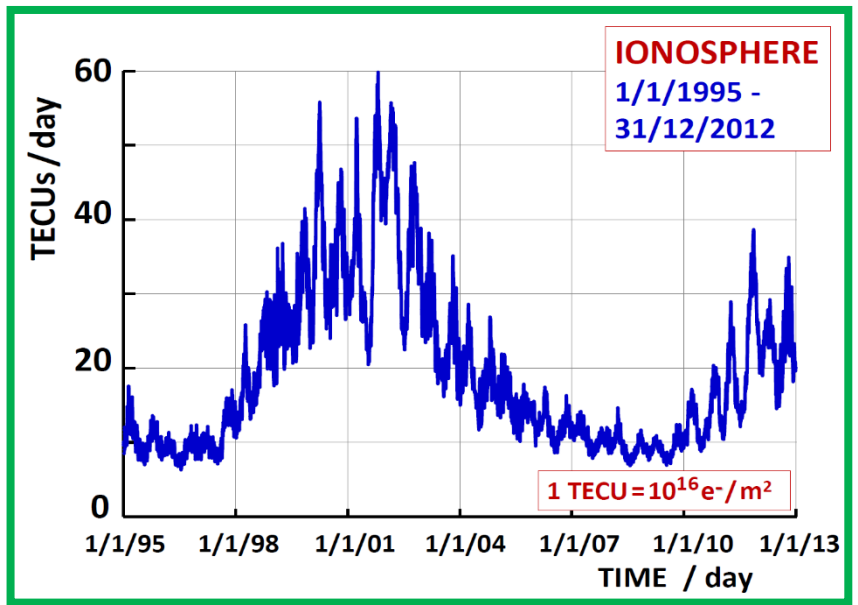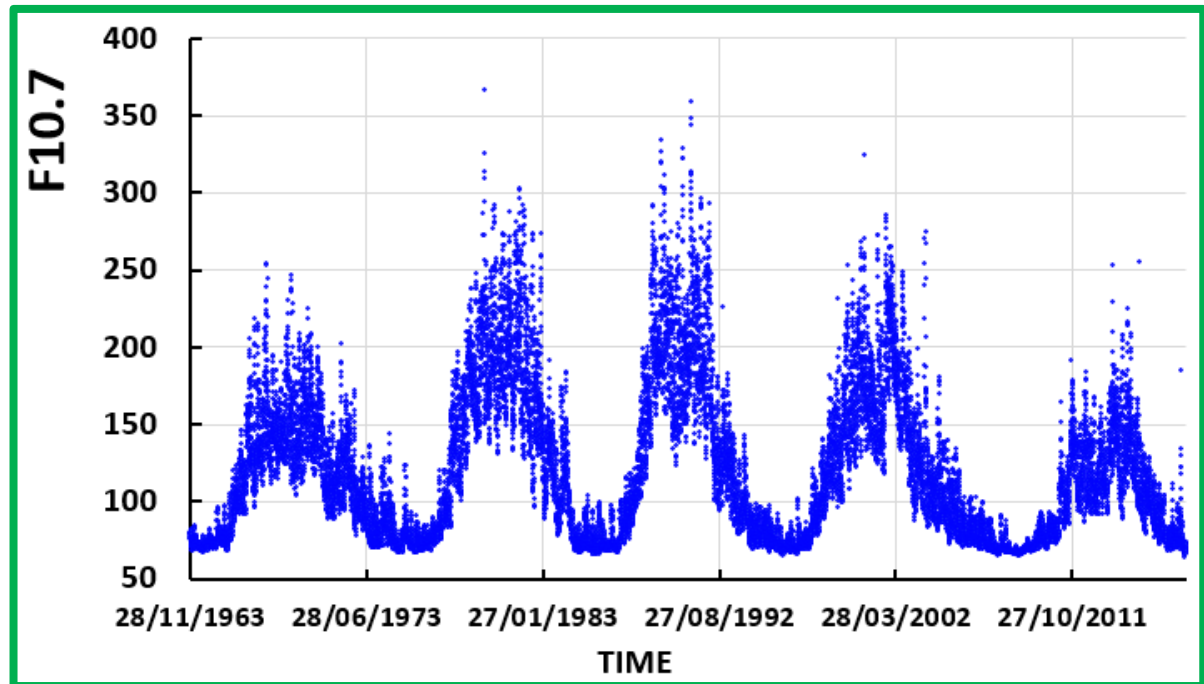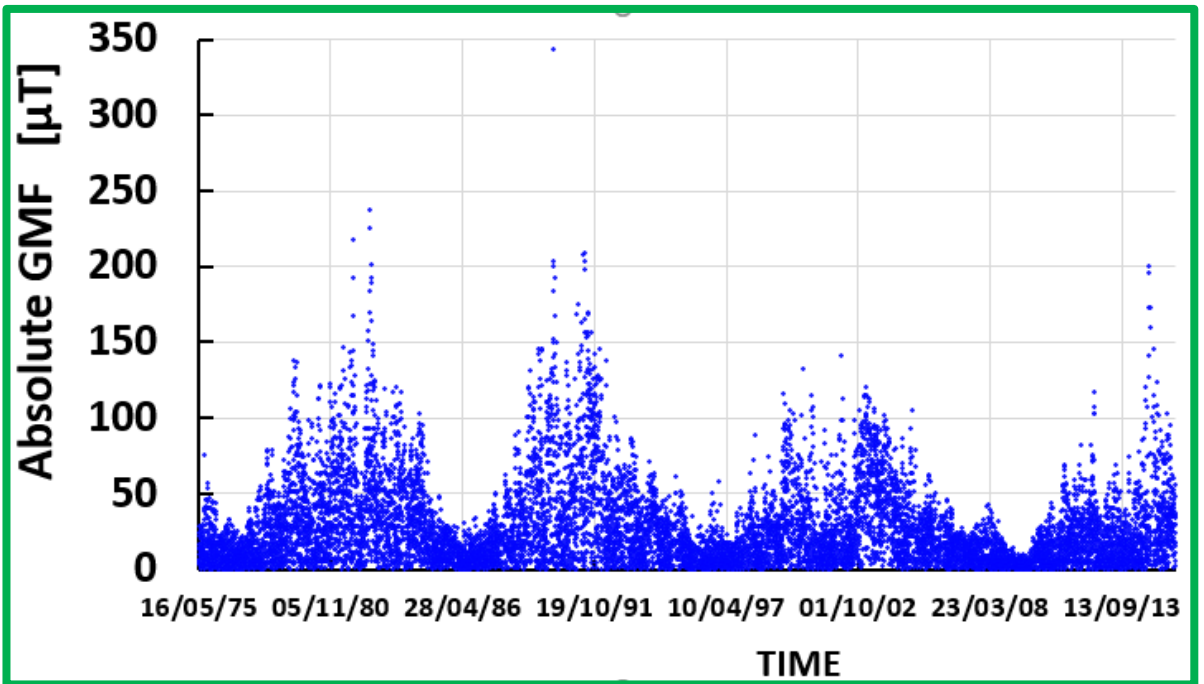

Supplement: s1 [file s1]
